# Supplementary material for: Vegetation and fire regimes in the Neotropics over the last 21,000 years
Source: Copernicus journal article supplement (doi:10.5194/egusphere-2025-1424), 2025-03-28
Supplement: Supplementary file 1 [file egusphere-2025-1424-supplement.zip]

## Sheet: Site_info
Ref	Group	Site name	Elevation m.asl	Lon	Lat	Time range minimum (cal yr BP)	Time range maximum (cal yr BP)	Pollen data source	Microcharcoal data source	Publication
1	NNeo	Lake Tulane TFG	38	-81.95	29.83	879	51096		Reading Palaeofire	Grimm, E.C., Watts, W.A., Jacobson Jr., G.L., Hansen, B.C.S., Almquist, H.R., Dieffenbacher-Krall, A.C., 2006. Evidence for warm wet Heinrich events in Florida. Quaternary Science Reviews 25, 2197–2211.
2	NNeo	SRM-1	12	-81.1144	25.39	45	6160		Neotoma	Yao, Q., K.-B. Liu, W.J. Platt, and V.H. Rivera-Monroy. 2015. Palynological reconstruction of environmental changes in coastal wetlands of the Florida Everglades since the mid-Holocene. Quaternary Research 83(3):449-458
3	NNeo	Laguna Herradura core	5	-98.15	22.01	14	1801		Reading Palaeofire	Dull, R.A., Nevle, R.J., Woods, W.I., Bird, D.K., Avnery, S., Denevan, W.M., 2010. The Columbian Encounter and the Little Ice Age: abrupt land use change, fire, and greenhouse forcing. Annals of the Association of American Geographers 100, 755–771.
4	NNeo	Ría Lagartos-2	7	-88.0721	21.5794	-50	3912	Neotoma		Aragón-Moreno, A.A., G.A. Islebe, and N. Torrescano-Valle. 2012. A ~3800-yr, high-resolution record of vegetation and climate change on the north coast of the Yucatan Peninsula. Review of Palaeobotany and Palynology 178:35-42.
5	NNeo	Ría Lagartos	6	-88.0865	21.5661	-60	3554	Neotoma		Carrillo-Bastos, A., G.A. Islebe, and N. Torrescano-Valle. 2013. 3800 years of quantitative precipitation reconstruction from the northwest Yucatan Peninsula. PLoS ONE 8(12):e84333.
6	NNeo	Cenote San Jose Chulchaca	7	-90.1333	20.8667	-1	1896	Neotoma		Leyden, B.W., M. Brenner, T.J. Whitmore, J.H. Curtis, D.R. Piperno, and B.H. Dahlin. 1996. A record of long- and short-term climatic variation from northwest Yucatan: Cenote San Jose Chulchaca. Pages 30-50 in S.L. Fedick, editor. The Managed Mosaic: Ancient Maya Agriculture and Resource Use. University of Utah Press, Salt Lake City, Utah, USA.
7	NNeo	Hoya Rincon de Parangueo	1772	-101.25	20.43	87	9836	Neotoma		Park, J. 2005. Holocene climate change and human environmental impacts in Guanajuato, Mexico. Doctoral dissertation. University of California Berkeley, Berkeley, California, USA.
8	NNeo	Hoya San Nicolás	1753	-101.257	20.3872	-48	11132	Neotoma		Park, J. 2005. Holocene climate change and human environmental impacts in Guanajuato, Mexico. Doctoral dissertation. University of California Berkeley, Berkeley, California, USA.
9	NNeo	Laguna Biajaca	56	-71.0865	19.5909	-65	1126	Neotoma		Castilla-Beltrán, A., H. Hooghiemstra, M.L.P. Hoogland, J. Pagán-Jiménez, B. van Geel, M.H. Field, M. Prins, T. Donders, E. Herrera Malatesta, J. Ulloa Hung, C.H. McMichael, W.D. Gosling, and C.L. Hofman. 2018. Columbusâ€™ footprint in Hispaniola: A paleoenvironmental record of indigenous and colonial impacts on the landscape of the central Cibao Valley, northern Dominican Republic. Anthropocene …
10	NNeo	Lake Patzcuaro	2056	-101.583	19.5833	-20	46640	Neotoma		Saporito, M.S. 1975. Chemical and mineral studies of a core from Lake Patzcuaro, Mexico. Master's thesis. University of Minnesota, Minneapolis, Minnesota, USA.
11	NNeo	Chalco Lake	2235	-99	19.5	45	19225	Neotoma		Lozano-García, M.S., B. Ortega-Guerrero, M. Caballero-Miranda, and J. Urrutia-Facugauchi. 1993. Late Pleistocene and Holocene Paleoenvironments of Chalco Lake, Central Mexico. Quaternary Research 40:332-342..
12	NNeo	Lake Tzib	15	-88.0701	19.2969	154	7736	Neotoma		Carrillo-Bastos, A., G.A. Islebe, N. Torrescano-Valle, and N.E. González. 2010. Holocene vegetation and climate history of central Quintana Roo, Yucatan Peninsula, Mexico. Review of Palaeobotany and Palynology 160:189-196.
13	-	Lake Chignahuapan core	2576	-99.53	19.16	1196	27090		Reading Palaeofire	Lozano-García, M. d.S., Sosa-Nájera, S., Sugiura, Y., Caballero, M., 2005. 23,000 yr of vegetation history of the Upper Lerma, a tropical high-altitude basin in Central Mexico. Quaternary Research 64, 70–82.
14	-	Lake Aljojuca core	2492	-97.5336	19.0911	53	6246		Reading Palaeofire	Bhattacharya, T., Byrne, R., 2016. Late Holocene anthropogenic and climatic influences on the regional vegetation of Mexico’s Cuenca Oriental. Global and Planetary Change 138, 56–69.
15	-	Bao-1 1997 core	1948	-71.03	19.06	-47	3949		Reading Palaeofire	Kennedy, L.M., Horn, S.P., Orvis, K.H., 2006. A 4000-year record of fire and forest history from Valle de Bao, Cordillera Central, Dominican Republic. Palaeogeography, Palaeoclimatology, Palaeoecology 231, 279–290.
16	-	Arrepentimientos	2207	-70.924	19.028	-61	6185	Neotoma		Crausbay, S.D., P.H. Martin, and E.F. Kelly. 2015. Tropical montane vegetation dynamics near the upper cloud belt strongly associated with a shifting ITCZ and fire. Journal of Ecology. v.103 (4), 891-903
17	NNeo	Castilla core	848	-70.8761	18.7978	-50	2090		Reading Palaeofire	Lane, C.S., Horn, S.P., Mora, C.I., Orvis, K.H., 2009. Late-Holocene paleoenvironmental change at mid-elevation on the Caribbean slope of the Cordillera Central, Dominican Republic: a multi-site, multi-proxy analysis. Quaternary Science Reviews 28, 2239–2260.
18	NNeo	Salvador core	848	-70.887	18.7958	-50	1811		Reading Palaeofire	Lane, C.S., Horn, S.P., Mora, C.I., Orvis, K.H., 2009. Late-Holocene paleoenvironmental change at mid-elevation on the Caribbean slope of the Cordillera Central, Dominican Republic: a multi-site, multi-proxy analysis. Quaternary Science Reviews 28, 2239–2260.
19	NNeo	Lago Catemaco	340	-95	18.66	-35	4892	Manually extracted		Byrne, A.R., and S.P. Horn. 1989. Prehistoric agriculture and forest clearance in the Sierra de los Tuxtlas, Veracruz, Mexico. Palynology 13:181-193.
20	NNeo	Silvituc	60	-90.2857	18.626	-50	6326	Neotoma		Torrescano-Valle, N., and G.A. Islebe. 2015. Holocene paleoecology, climate history and human influence in the southwestern Yucatan Peninsula. Review of Palaeobotany and Palynology 217:1-8.
21	NNeo	Lago Verde core	121	-95.34	18.61	-3	2302		Reading Palaeofire	Ortega, B., Caballero, M., Lozano-García, M. d.S, Vilaclara, G., Rodríguez, A., 2006. Rock magnetic and geochemical proxies for iron mineral diagenesis in a tropical lake: Lago Verde, Los Tuxtlas, East–Central Mexico. Earth and Planetary Science Letters 250, 444–458.
22	-	Río Hondo	7	-88.3194	18.4889	1279	7960	Neotoma		Aragón-Moreno, A.A., G.A. Islebe, P.D. Roy, N. Torrescano-Valle, and A.D. Mueller. 2018. Climate forcings on vegetation of the southeastern Yucatãn Peninsula (Mexico) during the middle to late Holocene. Palaeogeography, Palaeoclimatology, Palaeoecology 495:214-226.
23	NNeo	Lake Miragoane core	87	-73.05	18.4	-49	11901		Reading Palaeofire	Higuera-Gundy, A., Brenner, M., Hodell, D.A., Curtis, J.H., Leyden, B.W., Binford, M.W., 1999. A 10,300 14C yr record of climate and vegetation change from Haiti. Quaternary Research 52, 159–170.
24	NNeo	Laguna Pompal core	749	-94.9557	18.376	49	4729	Neotoma	Reading Palaeofire	Goman, M., Byrne, R., 1998. A 5000-year record of agriculture and tropical forest clearance in the Tuxtlas, Veracruz, Mexico. The Holocene 8, 83–89.
25	NNeo	Lago Puerto Arturo	199	-90.1833	17.5333	-173	9601	Neotoma		Anderson, L., and D. Wahl. 2016. Two Holocene paleofire records from Peten, Guatemala: Implications for natural fire regime and prehispanic Maya land use. Global and Planetary Change 138:82-92.
26	NNeo	Laguna EkNaab core	240	-89.2365	17.4211	818	1581		Reading Palaeofire	Wahl, D., Anderson, L., Estrada-Belli, F., Tokovinine, A., 2019. Palaeoenvironmental, epigraphic and archaeological evidence of total warfare among the Classic Maya. Nature Human Behaviour 3, 1049–1054.
27	NNeo	Lake Peten-Itza	155	-89.8719	16.9536	-8	87577	Neotoma		Correa-Metrio, A., M.B. Bush, K.R. Cabrera, S. Sully, M. Brenner, D.A. Hodell, J. Escobar, and T. Guilderson. 2012. Rapid climate change and no-analog vegetation in lowland Central America during the last 86,000 years. Quaternary Science Reviews 38:63-75.
28	NNeo	Lake Quexil	158	-89.8167	16.9167	8746	36282	Neotoma		Leyden, B.W. 1984. Guatemalan forest synthesis after Pleistocene aridity. Proceedings of the National Academy of Sciences USA 81:4856-4859.
29	NNeo	Cenote Kail core	1765	-91.554	16	430	6126	Neotoma	Reading Palaeofire	Harvey, W.J., Nogué, S., Stansell, N., Petrokofsky, G., Steinman, B., Willis, K.J., 2019. The legacy of Pre–Columbian fire on the pine–oak forests of upland Guatemala. Frontiers in Forests and Global Change 2, 34.
30	-	Vieux Fort	58	-61.301	15.986	-56	6885	Neotoma		Siegel, P.E., J.G. Jones, D.M. Pearsall, N.P. Dunning, P. Farrell, N.A. Duncan, J.H. Curtis, and S.K. Singh. 2015. Paleoenvironmental evidence for first human colonization of the eastern Caribbean. Quaternary Science Reviews 129:275-295.
31	NNeo	Aguada de Petapilla	752	-89.12	14.86	-4	4776		Reading Palaeofire	Rue, D., Webster, D., Traverse, A., 2002. Late Holocene fire and agriculture in the Copan Valley, Honduras. Ancient Mesoamerica 13, 267–272.
32	NNeo	Laguna Metapan core	478	-89.4778	14.3007	4	1540		Reading Palaeofire	Dull, R.A., Nevle, R.J., Woods, W.I., Bird, D.K., Avnery, S., Denevan, W.M., 2010. The Columbian Encounter and the Little Ice Age: abrupt land use change, fire, and greenhouse forcing. Annals of the Association of American Geographers 100, 755–771.
33	-	Iztapa core	7	-90.6597	13.9519	11	3215		Reading Palaeofire	Larmon, J.T. 2013. The Pacific coast of Guatemala: a palynological investigation of climate change and human occupation. Master's thesis. Washington State University, Pullman, Washington, USA.
34	NNeo	Laguna Llana del Espino core	746	-89.52	13.95	1	3069		Reading Palaeofire	Dull, R.A., 2004. A Holocene record of Neotropical savanna dynamics from El Salvador. Journal of Paleolimnology 32, 219–231.
35	NNeo	Charco Verde core	56	-85.63	11.47	-43	1326		Reading Palaeofire	Avnery, S., Dull, R.A., Keitt, T.H., 2011. Human versus climatic influences on late-Holocene fire regimes in southwestern Nicaragua. The Holocene 21, 699–706.
36	NNeo	Cantarrana core	50	-84	10.43	-41	3393		Reading Palaeofire	Kennedy, L.M., Horn, S.P., 2007. A late Holocene pollen and charcoal record from La Selva Biological Station, Costa Rica. Biotropica 40, 11–19.
37	NNeo	Lake Valencia	407	-67.7676	10.1658	-22	17559	Neotoma		Bradbury, J.P., B. Leyden, M. Salgado-Labouriau, W.M. Lewis, Jr., C. Schubert, M.W. Binford, D.G. Frey, D.R. Whitehead, and F.H. Weibezahn. 1981. Late Quaternary environmental history of Lake Valencia, Venezuela. Science 214(4527):1299-1305.
38	NNeo	La Chonta Bog	2314	-83.9431	9.68604	57	24808	Neotoma		Islebe, G.A., H. Hooghiemstra, and R. van 't Veer. 1996. Holocene vegetation and water level history in two bogs of the Cordillera de Talamanca, Costa Rica. Vegetatio 124(2):155-171.
39	-	Lago Chirripo	3460	-83.496	9.483	-35	5126		Reading Palaeofire	Horn, S.P., 1993. Postglacial vegetation and fire history in the Chirripó Páramo of Costa Rica. Quaternary Research 40, 107–116.
40	-	Lago de las Morrenas	3460	-83.48	9.48	24	11011		Reading Palaeofire	Horn, S.P., 1993. Postglacial vegetation and fire history in the Chirripó Páramo of Costa Rica. Quaternary Research 40, 107–116.
41	NNeo	Paramo de Piedras Blancas	1223	-70.8333	9.16667	0	1340	Neotoma		Rull, V., M.-L. Salgado-Labouriau, C. Schubert, and S. Valastro, Jr. 1987. Late Holocene temperature depression in the Venezuelan Andes: palynological evidence. Palaeogeography, Palaeoclimatology, Palaeoecology 60:109-121..
42	NNeo	Boquillas	13	-74.5625	9.12361	1415	11778	Neotoma		Berrío, J.C., A. Boom, P.J. Botero, L.F. Herrera, H. Hooghiemstra, F. Romero, and G. Sarmiento. 2001. Multi-disciplinary evidence of the Holocene history of a cultivated floodplain area in the wetlands of northern Colombia. Vegetation history and archaeobotany 10(3):161-174.
43	-	Paramo de Miranda	3796	-70.8333	8.91667	312	15601	Neotoma		Salgado-Labouriau, M.-L. 1988. Sequence of colonization by plants in the Venezuelan Andes after the last Pleistocene glaciation. Journal of Palynology 23/24:189-204.
44	NNeo	Laguna Zoncho charcoal	1033	-82.96	8.81	-47	3018		Reading Palaeofire	Clement, R.M., Horn, S.P., 2001. Pre-Columbian land-use history in Costa Rica: a 3000-year record of forest clearance, agriculture and fires from Laguna Zoncho. The Holocene 11, 419–426.
45	-	Valle Laguna Victoria	3519	-70.7917	8.80833	0	12810	Neotoma		Graf, K DOI: 10.21233/n3h49g
46	-	Valle Laguna Negra	3275	-70.7667	8.79167	0	3345	Neotoma		Graf, K DOI: 10.21233/n3mv1m
47	NNeo	Laguna Volcan core	1138	-82.68	8.75	-25	2882		Reading Palaeofire	Behling, H., 2000. A 2860-year high-resolution pollen and charcoal record from the Cordillera de Talamanca in Panama: a history of human and volcanic forest disturbance. The Holocene 10, 387–393.
48	NNeo	Laguna Santa Elena core	383	-82.56	8.56	0	1651		Reading Palaeofire	Anchukaitis, K.J., Horn, S.P., 2005. A 2000-year reconstruction of forest disturbance from southern Pacific Costa Rica. Palaeogeography, Palaeoclimatology, Palaeoecology 221, 35–54.
49	NNeo	Cana Swamp 1	260	-77.58	7.75	-49	4220		Reading Palaeofire	Bush, M.B., Colinvaux, P.A., 1994. Tropical forest disturbance: paleoecological records from Darien, Panama. Ecology 75, 1761–1768.
50	NNeo	Lake Wodehouse core	458	-77.55	7.65	22	5339		Reading Palaeofire	Bush, M.B., Colinvaux, P.A., 1994. Tropical forest disturbance: paleoecological records from Darien, Panama. Ecology 75, 1761–1768.
51	Amazonia	GeoB16224-1	-2510	-52.0942	6.66056	4944	23068	Pangaea	Pangaea	Akabane et al., under review. Slowdown of ocean circulation increases the vulnerability of northern Amazon forests
52	-	Laguna Ciega	3385	-72.3909	6.47821	-2	37833	Neotoma		van der Hammen, T., J. Barelds, H. de Jong, and A.A. de Veer. 1981. Glacial sequence and environmental history in the Sierra Nevada del Cocuy (Colombia). Palaeogeography, Palaeoclimatology, Palaeoecology 32:247-340.
53	-	Llano Grande Mire	3455	-76.0926	6.47451	-51	17670	Neotoma		Velásquez-R., C.A., and H. Hooghiemstra. 2013. Pollen-based 17-kyr forest dynamics and climate change from the Western Cordillera of Colombia; no-analogue associations and temporarily lost biomes. Review of Palaeobotany and Palynology 194:38-49.
54	-	Valle de Lagunillas VII	3950	-72.3464	6.38741	108	8053	Neotoma		Gonzalez, E., T. van der Hammen, and R.F. Flint. 1965. Late Quaternary glacial and vegetational sequence in Valle de Lagunillas, Sierra Nevada del Cocuy, Colombia. Leidse Geologische Mededelingen 32(1):157-182.
55	-	Valle de Lagunillas VIII	3950	-72.3463	6.38712	104	11314	Neotoma		Gonzalez, E., T. van der Hammen, and R.F. Flint. 1965. Late Quaternary glacial and vegetational sequence in Valle de Lagunillas, Sierra Nevada del Cocuy, Colombia. Leidse Geologische Mededelingen 32(1):157-182.
56	-	Valle de Lagunillas V	3950	-72.3375	6.37587	894	14814	Neotoma		Gonzalez, E., T. van der Hammen, and R.F. Flint. 1965. Late Quaternary glacial and vegetational sequence in Valle de Lagunillas, Sierra Nevada del Cocuy, Colombia. Leidse Geologische Mededelingen 32(1):157-182.
57	-	Valle de la Bocatoma XI	4363	-72.3324	6.36657	9541	13115	Neotoma		Gonzalez, E., T. van der Hammen, and R.F. Flint. 1965. Late Quaternary glacial and vegetational sequence in Valle de Lagunillas, Sierra Nevada del Cocuy, Colombia. Leidse Geologische Mededelingen 32(1):157-182.
58	-	Valle de la Bocatoma IX	4363	-72.3255	6.36581	346	7840	Neotoma		Gonzalez, E., T. van der Hammen, and R.F. Flint. 1965. Late Quaternary glacial and vegetational sequence in Valle de Lagunillas, Sierra Nevada del Cocuy, Colombia. Leidse Geologische Mededelingen 32(1):157-182.
59	-	Laguna de los Bobos	3324	-72.7667	6.22204	-8	8070	Neotoma		van der Hammen, T. 1962. Palinologia de la region de â€œLaguna de los Bobosâ€: Historia de su clima, vegetacion y agricultura durante los ultimos 5.000 años. Revista de la Academia Colombiana de Ciencias Exactas, Físicas y Naturales 11(44):359-361.
60	-	Ciénaga del Visitador	3242	-72.793	6.17704	-2	17943	Neotoma		van der Hammen, T., and E. Gonzalez. 1965. A Late-glacial and Holocene pollen diagram from Cienaga del Visitador (Dept. Boyaca, Colombia). Leidse Geologische Mededelingen 32:193-201.
61	-	Pantano de Vargas 1	2507	-73.0672	5.77789	1650	10895	Neotoma		Gómez, A., J.C. Berrío, H. Hooghiemstra, M. Becerra, and R. Marchant. 2007. A Holocene pollen record of vegetation change and human impact from Pantano de Vargas, an intra-Andean basin of Duitama, Colombia. Review of Palaeobotany and Palynology 145(1):143-157.
62	-	Laguna de Fúquene	2615	-73.7532	5.45339	-13	45786	Neotoma		van Geel, B., and T. van der Hammen. 1973. Upper Quaternary vegetational and climatic sequence of the Fuquene area (Eastern Cordillera, Colombia). Palaeogeography, Palaeoclimatology, Palaeoecology 14(1):9-92.
63	-	Apakara	2303	-62.2261	5.32278	66	6674	Manually extracted	Manually extracted	Rull, V., Montoya, E., 2017. Holocene vegetation dynamics on the Apakará summit of the neotropical Guayana Highlands and potential environmental drivers. Rev. Palaeobot. Palynol. 240, 22–32.
64	-	Páramo de Laguna Verde	3525	-74.004	5.21543	-30	6522	Neotoma		Kuhry, P. 1988. Palaeobotanical-palaeoecological studies of tropical high Andean peatbog sections (Cordillera Oriental, Colombia). Dissertationes Botanicae 116. J. Cramer, Berlin, Germany.
65	Amazonia	Leg155	-3410	-47.1	5.18	4217	49375	Manually extracted		Haberle, S.G., Maslin, M. a, 1999. Late Quaternary Vegetation and Climate Change in the Amazon Basin Based on a 50,000 Year Pollen Record from the Amazon Fan, ODP Site 932. Quat. Res. 51, 27–38
66	-	Páramo de Peña Negra 1	3404	-74.1001	5.07352	-33	18754	Neotoma		Kuhry, P. 1988. Palaeobotanical-palaeoecological studies of tropical high Andean peatbog sections (Cordillera Oriental, Colombia). Dissertationes Botanicae 116. J. Cramer, Berlin, Germany.
67	-	Páramo de Agua Blanca	2821	-74.1569	4.99445	-35	407474	Neotoma		Helmens, K.F. 1990. Neogene-Quaternary geology of the high plain of Bogotá, Eastern Cordillera, Colombia (stratigraphy, paleoenvironments and landscape evolution). Doctoral dissertation. University of Amsterdam, Amsterdam, The Netherlands.
68	-	Laguna Sardinas	101	-69.5217	4.96992	-49	13860	Neotoma		Behling, H., and H. Hooghiemstra. 1998. Late Quaternary palaeoecology and palaeoclimatology from pollen records of the savannas of the Llanos Orientales in Colombia. Palaeogeography, Palaeoclimatology, Palaeoecology 139(3-4):251-267.
69	-	Rosarito	3469	-75.2296	4.90185	1588	30193	Neotoma		van der Hammen, T., A.M. Cleef, and G.W. Noldus. 1995. A palynological record of the Rosarito pedo-tephro stratigraphical sequence (Central Cordillera, Colombia): vegetational history of the last 35,000 years. Pages 431-440 in T. van der Hammen and A.G. dos Santos, editors. La Cordillera Central Colombiana transecto Parque Los Nevados (tercera parte). Studies on tropical Andean ecosystems/Estudio…
70	-	Laguna de la Herrera	2593	-74.2782	4.69603	-2	6002	Neotoma		van der Hammen, T., and E. Gonzalez. 1965. A pollen diagram from "Laguna de la Herrera" (Sabana de Bogota). Leidse Geologische Mededelingen 32(1):183-191.
71	-	Laguna El Piñal	156	-71.4563	4.65877	894	22504	Neotoma		Behling, H., and H. Hooghiemstra. 1999. Environmental history of the Colombian savannas of the Llanos Oriantales since the Last Glacial Maximum from lake records El Pinal and Carimagua. Journal of Paleolimnology 21(4):461-476.
72	-	Laguna Chenevo	161	-71.4412	4.59319	-53	8296	Neotoma		Berrío Mogollón, J.C. 2002. Doctoral dissertation. Amsterdam, The Netherlands.
73	-	Laguna Carimagua-Bosque	168	-71.3276	4.5861	-49	1170	Neotoma		Berrio, J.C., H. Hooghiemstra, H. Behling, and K. van der Borg. 2000. Late Holocene history of savanna gallery forest from Carimagua area, Colombia. Review of Palaeobotany and Palynology 111(3-4):295-308.
74	-	Laguna Carimagua	170	-71.3324	4.57646	1175	9478	Neotoma		Behling, H., and H. Hooghiemstra. 1999. Environmental history of the Colombian savannas of the Llanos Oriantales since the Last Glacial Maximum from lake records El Pinal and Carimagua. Journal of Paleolimnology 21(4):461-476.
75	-	Laguna Angel	181	-70.5392	4.44909	-49	11864	Neotoma		Behling, H., and H. Hooghiemstra. 1998. Late Quaternary palaeoecology and palaeoclimatology from pollen records of the savannas of the Llanos Orientales in Colombia. Palaeogeography, Palaeoclimatology, Palaeoecology 139(3-4):251-267.
76	-	Andabobos	3835	-74.2514	4.09922	408	18589	Neotoma		Melief, A.B.M. 1985. Late Quaternary paleoecology of the Parque Nacional Natural los Nevados (Cordillera Central) and Sumapaz (Cordillera Oriental) areas, Colombia. Doctoral dissertation. Universiteit van Amsterdam, Amsterdam, The Netherlands.
77	-	Cuchilla La Rabona	3882	-74.25	4	-23	8089	Neotoma		Melief, A.B.M. 1985. Late Quaternary paleoecology of the Parque Nacional Natural los Nevados (Cordillera Central) and Sumapaz (Cordillera Oriental) areas, Colombia. Doctoral dissertation. Universiteit van Amsterdam, Amsterdam, The Netherlands.
78	-	Laguna La Primavera	3709	-74.1586	3.98138	14	8434	Neotoma		Melief, A.B.M. 1985. Late Quaternary paleoecology of the Parque Nacional Natural los Nevados (Cordillera Central) and Sumapaz (Cordillera Oriental) areas, Colombia. Doctoral dissertation. Universiteit van Amsterdam, Amsterdam, The Netherlands.
79	-	Laguna Negra de Alsacia	3539	-74.0932	3.96595	1894	32122	Neotoma		Melief, A.B.M. 1985. Late Quaternary paleoecology of the Parque Nacional Natural los Nevados (Cordillera Central) and Sumapaz (Cordillera Oriental) areas, Colombia. Doctoral dissertation. Universiteit van Amsterdam, Amsterdam, The Netherlands.
80	-	Laguna Mozambique	187	-73.0544	3.95414	-20	3872	Neotoma		Berrío Mogollón, J.C. 2002. Doctoral dissertation. Amsterdam, The Netherlands.
81	-	Laguna Gobernador	3659	-74.3	3.95295	-26	12921	Neotoma		Melief, A.B.M. 1985. Late Quaternary paleoecology of the Parque Nacional Natural los Nevados (Cordillera Central) and Sumapaz (Cordillera Oriental) areas, Colombia. Doctoral dissertation. Universiteit van Amsterdam, Amsterdam, The Netherlands.
82	-	Laguna La Guitarra	3656	-74.1605	3.95275	140	19192	Neotoma		Melief, A.B.M. 1985. Late Quaternary paleoecology of the Parque Nacional Natural los Nevados (Cordillera Central) and Sumapaz (Cordillera Oriental) areas, Colombia. Doctoral dissertation. Universiteit van Amsterdam, Amsterdam, The Netherlands.
83	Amazonia	Caracanã	112	-59.8	3.85	10071	49460		Manually extracted	Cordeiro, R.C., Turcq, B., Moreira, L.S., Rodrigues, R. de A.R., Lamego Simões Filho, F.F., Martins, G.S., Santos, A.B., Barbosa, M., Guilles da Conceição, M.C., Rodrigues, R. de C., Evangelista, H., Moreira-Turcq, P., Penido, Y.P., Sifeddine, A., Seoane, J.C.S., 2014. Palaeofires in Amazon: Interplay between land use change and palaeoclimatic events. Palaeogeogr. Palaeoclimatol. Palaeoecol. 415,…
84	Amazonia	Serra do Tepequem core	522	-61.7043	3.79201	5129	7485	Neotoma	Reading Palaeofire	Rodríguez-Zorro, P.A., M.L. Costa, and H. Behling. 2017. Mid-Holocene vegetation dynamics with an early expansion of Mauritia flexuosa palm trees inferred from the Serra do Tepequém in the savannas of Roraima State in Amazonia, northwestern Brazil. Vegetation History and Archaeobotany 26(5):455-468.
85	Amazonia	Laguna Las Margaritas core	262	-73.4165	3.36626	632	11100	Neotoma	Reading Palaeofire	Wille, M., H. Hooghiemstra, B. van Geel, H. Behling, A. de Jong, and K. van der Borg. 2003. Submillennium-scale migrations of the rainforestâ€“savanna boundary in Colombia: 14C wiggle-matching and pollen analysis of core Las Margaritas. Palaeogeography, Palaeoclimatology, Palaeoecology 193(2):201-223.
86	Amazonia	Laguna Loma Linda	244	-73.3631	3.30131	76	10206	Neotoma		Behling, H., and H. Hooghiemstra. 2000. Holocene Amazon rainforestâ€“savanna dynamics and climatic implications: high-resolution pollen record from Laguna Loma Linda in eastern Colombia. Journal of Quaternary Science 15(7):687-695.
87	-	Quilichao core	978	-76.51	3.1	-52	14547	Neotoma	Reading Palaeofire	Berrío, J.C., Hooghiemstra, H., Marchant, R., Rangel, O., 2002. Late-glacial and Holocene history of the dry forest area in the south Colombian Cauca Valley. Journal of Quaternary Science 17, 667–682.
88	-	La Teta-2	995	-76.5333	3.0833	-50	10337	Neotoma		Berrío Mogollón, J.C. 2002. Doctoral dissertation. Amsterdam, The Netherlands.
89	-	La-Teta core-2	995	-76.53	3.08	0	9687		Reading Palaeofire	Berrío, J.C., Hooghiemstra, H., Marchant, R., Rangel, O., 2002. Late-glacial and Holocene history of the dry forest area in the south Colombian Cauca Valley. Journal of Quaternary Science 17, 667–682.
90	-	Pantano de Genagra	1748	-76.6065	2.47442	-28	52000	Neotoma		Wille, M., H. Hooghiemstra, H. Behling, K. van der Borg, and A.J. Negret. 2001. Environmental change in the Colombian subandean forest belt from 8 pollen records: the last 50 kyr. Vegetation History and Archaeobotany 10(2):61-77.
91	-	Piagua	1700	-76.7806	2.43268	-50	21911	Neotoma	Neotoma	Wille, M., H. Hooghiemstra, H. Behling, K. van der Borg, and A.J. Negret. 2001. Environmental change in the Colombian subandean forest belt from 8 pollen records: the last 50 kyr. Vegetation History and Archaeobotany 10(2):61-77.
92	-	Rio Timbio	1773	-76.7094	2.36575	136	32512	Neotoma		Wille, M. 2001. Vegetation history and climate records of Colombian lowland areas: rain forest, savanna and intermontane ecosystems. Doctoral dissertation. University of Amsterdam, Amsterdam, The Netherlands.
93	-	Potrerillo-2	642	-77.0542	2.10005	0	9463	Neotoma		González-Carranza, Z., J.C. Berrío, H. Hooghiemstra, J.F. Duivenvoorden, and H. Behling. 2008. Changes of seasonally dry forest in the Colombian Patía Valley during the early and middle Holocene and the development of a dry climatic record for the northernmost Andes. Review of Palaeobotany and Palynology 152(1-2):1-10.
94	-	El Patia core	1000	-77	2.03	0	9675		Reading Palaeofire	Vélez, M.I., Berrío, J.C., Hooghiemstra, H., Metcalfe, S., Marchant, R., 2005. Palaeoenvironmental changes during the last ca. 8590 calibrated yr (7800 radiocarbon yr) in the dry forest ecosystem of the Patía Valley, Southern Colombian Andes: a multiproxy approach. Palaeogeography, Palaeoclimatology, Palaeoecology 216, 279–302.
95	-	El Patía-1	600	-77.1207	2.00948	-53	9899	Neotoma		Vélez, M.I., J.C. Berrio, H. Hooghiemstra, S. Metcalfe, and R. Marchant. 2005. Palaeoenvironmental changes during the last ca. 8590 calibrated yr (7800 radiocarbon yr) in the dry forest ecosystem of the Patía Valley, Southern Colombian Andes: a multiproxy approach. Palaeogeography, Palaeoclimatology, Palaeoecology 216(3-4):279-302.
96	-	Laguna Piusbi [Laguna El Trueno]	126	-77.9323	1.88174	-240	6147	Neotoma		Behling, H., H. Hooghiemstra, and A.J. Negret. 1998. Holocene history of the Chocó rain forest from Laguna Piusbi, southern Pacific Lowlands of Colombia. Quaternary Research 50(3):300-308.
97	NEB	GeoB16205-4	-4282	-43.1	1.35139	10013	13062	Pangaea	Pangaea	Bouimetarhan, I., Chiessi, C.M., González-Arango, C., Dupont, L., Voigt, I., Prange, M., Zonneveld, K., 2018. Intermittent development of forest corridors in northeastern Brazil during the last deglaciation: Climatic and ecologic evidence. Quat. Sci. Rev. 192, 86–96.
98	-	Laguna De La Cocha	2824	-77.1585	1.06608	-57	3782	Neotoma		Epping, I. 2009. Environmental change in the Colombian upper forest belt. Master's thesis. University of Amsterdam, Amsterdam, The Netherlands.
99	Amazonia	Lake Pata	165	-66.6767	0.28602	-59	7593	Neotoma		Nascimento, M.N., G.S. Martins, R.C. Cordeiro, B. Turcq, L.S. Moreira, and M.B. Bush. 2019. Vegetation response to climatic changes in western Amazonia over the last 7,600 years. Journal of Biogeography 46:2389-2406.
100	Amazonia	Lake Pata	88	-66.06	0.26	455	48202		Reading Palaeofire	Bush, M.B., de Oliveira, P.E., 2006. The rise and fall of the Refugial Hypothesis of Amazonian speciation: a paleoecological perspective. Biota Neotropica 6.
101	CAn	Cayambe	3978	-78.0333	-0.03333	360	6224	Neotoma		Graf, K. 1992. Pollendiagramme aus den Anden: Eine Synthese zur Klimageschichte und Vegetationsentwicklung seit der letzten Eiszeit. Physische Geographie 34. Universität Zürich-Irchel, Geographisches Institut, Zürich, Switzerland.
102	Amazonia	Lake Acarabixi core	46	-64.4989	-0.34583	776	10886	Neotoma	Reading Palaeofire	Rodríguez-Zorro, P.A., B. Turcq, R.C. Cordeiro, L.S. Moreira, R.L. Costa, C.H. McMichael, and H. Behling. 2018. Forest stability during the early and late Holocene in the igapó floodplains of the Rio Negro, northwestern Brazil. Quaternary Research 89(1):75-89.
103	CAn	Lake Huila	2661	-78.0179	-0.42342	-63	670	Neotoma		Loughlin, N.J.D. 2018. Changing human impact on the montane forests of the eastern Andean flank, Ecuador. Doctoral dissertation. The Open University, Milton Keynes, United Kingdom.
104	Amazonia	Quebrada del Amor	194	-72.3996	-0.602128	-58	154	Neotoma		Berrío, J.C., M.V. Arbeláez, J.F. Duivenvoorden, A.M. Cleef, and H. Hooghiemstra. 2003. Pollen representation and successional vegetation change on the sandstone plateau of Araracuara, Colombian Amazonia. Review of Palaeobotany and Palynology 126(3-4):163-181.
105	-	Lago Crispim core	12	-47.64	-0.62	-19	8487		Reading Palaeofire	Behling, H., da Costa, M.L., 2001. Holocene vegetational and coastal environmental changes from the Lago Crispim record in northeastern Pará State, eastern Amazonia. Review of Palaeobotany and Palynology 114, 145–155.
106	Amazonia	Maxus-Core 5	250	-76.45	-0.7	-50	42750	Neotoma	Reading Palaeofire	Athens, J.S., Ward, J.V., 1999. The Late Quaternary of the Western Amazon: climate, vegetation and humans. Antiquity 73, 287–302.
107	Amazonia	Pantano de Mônica 1	128	-72.0517	-0.7003	4023	15329	Neotoma		Behling, H., J.C. Berrio, and H. Hooghiemstra. 1999. Late Quaternary pollen records from the middle Caquetá river basin in central Colombian Amazon. Palaeogeography, Palaeoclimatology, Palaeoecology 135(1-3):193-213.
108	Amazonia	Pantano de Mônica 3	128	-72.0557	-0.70373	-48	3803	Neotoma		Behling, H., J.C. Berrio, and H. Hooghiemstra. 1999. Late Quaternary pollen records from the middle Caquetá river basin in central Colombian Amazon. Palaeogeography, Palaeoclimatology, Palaeoecology 135(1-3):193-213.
109	Amazonia	Pantano de Mônica 2	128	-72.0596	-0.706	-51	4481	Neotoma		Behling, H., J.C. Berrio, and H. Hooghiemstra. 1999. Late Quaternary pollen records from the middle Caquetá river basin in central Colombian Amazon. Palaeogeography, Palaeoclimatology, Palaeoecology 135(1-3):193-213.
110	Amazonia	Lagoa da Curuca	21	-47.85	-0.76667	0	10750	Neotoma	Reading Palaeofire	Behling, H. 1996. First report on new evidence for the occurrence of Podocarpus and possible human presence at the mouth of the Amazon during the Late-glacial. Vegetation History and Archaeobotany 5:241-246.
111	Amazonia	Santa Maria core	57	-53.6	-1.57	15	9041		Reading Palaeofire	Bush, M.B., Silman, M.R., de Toledo, M.B., Listopad, C., Gosling, W.D., Williams, C., de Oliveira, P.E., Krisel, C., 2007. Holocene fire and occupation in Amazonia: records from two lake districts. Philosophical Transactions of the Royal Society B: Biological Sciences 362, 209–218.
112	Amazonia	Comprida core	170	-53.99	-1.62	656	10613		Reading Palaeofire	Bush, M.B., Miller, M.C., de Oliveira, P.E., Colinvaux, P.A., 2000. Two histories of environmental change and human disturbance in eastern lowland Amazonia. The Holocene 10, 543–553.
113	Amazonia	Geral core C	34	-53.59	-1.64	66	8265		Reading Palaeofire	Bush, M.B., Miller, M.C., de Oliveira, P.E., Colinvaux, P.A., 2000. Two histories of environmental change and human disturbance in eastern lowland Amazonia. The Holocene 10, 543–553.
114	Amazonia	Saracuri core	31	-53.57	-1.67	8	8487		Reading Palaeofire	Bush, M.B., Silman, M.R., de Toledo, M.B., Listopad, C., Gosling, W.D., Williams, C., de Oliveira, P.E., Krisel, C., 2007. Holocene fire and occupation in Amazonia: records from two lake districts. Philosophical Transactions of the Royal Society B: Biological Sciences 362, 209–218.
115	Amazonia	Rio Curua core	36	-51.45	-1.73	0	8751		Reading Palaeofire	Behling, H., da Costa, M.L., 2000. Holocene environmental changes from the Rio Curuá record in the Caxiuanã region, eastern Amazon Basin. Quaternary Research 53, 369–377.
116	CAn	Laguna Pallcacocha core	3918	-79.16	-2.75	9675	14682	Neotoma	Reading Palaeofire	Hansen, B.C.S., Rodbell, D.T., Seltzer, G.O., León, B., Young, K.R., Abbott, M., 2003. Late-glacial and Holocene vegetational history from two sites in the western Cordillera of southwestern Ecuador. Palaeogeography, Palaeoclimatology, Palaeoecology 194, 79–108.
117	CAn	Laguna Chorreras	3918	-79.1606	-2.77057	-45	19561	Neotoma	Reading Palaeofire	Hansen, B.C.S., D.T. Rodbell, G.O. Seltzer, B. León, K.R. Young, and M. Abbott. 2003. Late-glacial and Holocene vegetational history from two sites in the western Cordillera of southwestern Ecuador. Palaeogeography, Palaeoclimatology, Palaeoecology 194(1-3):79-108.
118	Amazonia	Lake Caranã	74	-55.04	-2.83	-61	8608	Neotoma	Reading Palaeofire	Maezumi, S.Y., Robinson, M., de Souza, J., Urrego, D.H., Schaan, D., Alves, D., Iriarte, J., 2018. New insights from Pre-Columbian land use and fire management in Amazonian dark earth forests. Frontiers in Ecology and Evolution 6.
119	Amazonia	Lake Kumpaka	477	-77.9621	-2.83663	-66	2544	Neotoma		Åkesson, C.M., C.N.H. McMichael, M.F. Raczka, S.N. Huisman, M. Palmeira, J. Vogel, D. Neill, J. Veizaj, and M.B. Bush. 2021. Long-term ecological legacies in western Amazonia. Journal of Ecology.
120	CAn	Llaviucu	3519	-79.1461	-2.84278	-60	12848	Neotoma		Nascimento, M.N., N.A.S. Mosblech, M.F. Raczka, S. Baskin, K.E. Manrique, J. Wilger, L. Giosan, X. Benito, and M.B. Bush. 2020. The adoption of agropastoralism and increased ENSO frequency in the Andes. Quaternary Science Reviews 243:106471.
121	-	Caco MA97-1	84	-43.2678	-2.97022	1	22075	Manually extracted	Reading Palaeofire	Ledru, M.-P., Ceccantini, G., Marques Gouveia, S.E., López-Sáez, J.A., Ruiz Pessenda, L.C., de Souza Ribeiro, A., 2006. Millenial-scale climatic and vegetation changes in a northern Cerrado (Northeast, Brazil) since the Last Glacial Maximum. Quaternary Science Reviews 25, 1110–1126.
122	Amazonia	Surucucho core	386	-78	-3.06	386	21358		Reading Palaeofire	Colinvaux, P.A., Bush, M.B., Steinitz-Kannan, M., Miller, M.C., 1997. Glacial and postglacial pollen records from the Ecuadorian Andes and Amazon. Quaternary Research 48, 69–78.
123	-	Lago Formoso	17	-45.3861	-3.25389	503	7799		Neotoma	Alves de Moraes, Caio; Lima da Costa, Marcondes; Guida Navarro, Alexandre; Nunes da Silva Meneses, Maria Ecilene; Boiadeiro Ayres Negrão, Leonardo; Pöllmann, Herbert; Behling, Hermann (2021): Holocene coastal environmental changes inferred by multi-proxy analysis from Lago Formoso sediments in Maranhão State, northeastern Brazil. Quaternary Science Reviews, 273, 107234
124	NEB	GeoB 3104-1	-1431	-37.575	-3.66694	9897	49073	Manually extracted		Behling, H., W. Arz, H., Pätzold, J., Wefer, G., 2000. Late Quaternary vegetational and climate dynamics in northeastern Brazil, inferences from marine core GeoB 3104-1. Quat. Sci. Rev. 19, 981–994.
125	CNAn	El Tiro Bog core	2265	-79.14	-3.84	44	20000		Reading Palaeofire	Niemann, H., Behling, H., 2008. Late Quaternary vegetation, climate and fire dynamics inferred from the El Tiro record in the southeastern Ecuadorian Andes. Journal of Quaternary Science 23, 203–212.
126	NEB	Maranguape	483	-38.7202	-3.89619	932	5361	Neotoma		Montade, V., M.-P. Ledru, J. Burte, E.S.P.R. Martins, C.F. Verola, I.R.d. Costa, and F.H. Magalhães e Silva. 2014. Stability of a Neotropical microrefugium during climatic instability. Journal of Biogeography 41(6):1215-1226.
127	CAn	Laguna Zurita core	2336	-79.1176	-3.97467	-65	1165	Neotoma	Reading Palaeofire	Niemann, H., and H. Behling. 2010. Late Holocene environmental change and human impact inferred from three soil monoliths and the Laguna Zurita multi-proxi record in the southeastern Ecuadorian Andes. Vegetation History Archaeobotany 19:1-15.
128	CNAn	ECSF Refugio core	2260	-79.0736	-3.975	407	843		Reading Palaeofire	Niemann, H., Behling, H., 2009. Late Holocene environmental change and human impact inferred from three soil monoliths and the Laguna Zurita multi-proxi record in the southeastern Ecuadorian Andes. Vegetation History and Archaeobotany 19, 1–15.
129	CAn	EL Tiro-Pass	2617	-79.1452	-3.98978	143	19929	Neotoma	Neotoma	Niemann, H., and H. Behling. 2008. Late Quaternary vegetation, climate and fire dynamics inferred from the El Tiro record in the southeastern Ecuadorian Andes. Journal of Quaternary Science 23:203-212.
130	CAn	Estacíon Científica SF Cerro de Consuelo	2738	-79.0596	-4.00244	636	1402	Neotoma		Niemann, H., and H. Behling. 2010. Late Holocene environmental change and human impact inferred from three soil monoliths and the Laguna Zurita multi-proxi record in the southeastern Ecuadorian Andes. Vegetation History Archaeobotany 19:1-15.
131	CNAn	ECSF Cerro de Consuelo core	2738	-79.0596	-4.00244	503	1435		Reading Palaeofire	Niemann, H., Behling, H., 2009. Late Holocene environmental change and human impact inferred from three soil monoliths and the Laguna Zurita multi-proxi record in the southeastern Ecuadorian Andes. Vegetation History and Archaeobotany 19, 1–15.
132	CAn	Cocha Caranga Mire	2710	-79.1626	-4.04382	-15	1647	Neotoma	Reading Palaeofire	Niemann, H., Behling, H., 2009. Late Pleistocene and Holocene environmental change inferred from the Cocha Caranga sediment and soil records in the southeastern Ecuadorian Andes. Palaeogeography, Palaeoclimatology, Palaeoecology 276, 1–14.
133	CAn	Laguna Cocha Caranga core	2710	-79.1596	-4.04586	-55	13552	Neotoma	Reading Palaeofire	Niemann, H., Behling, H., 2009. Late Pleistocene and Holocene environmental change inferred from the Cocha Caranga sediment and soil records in the southeastern Ecuadorian Andes. Palaeogeography, Palaeoclimatology, Palaeoecology 276, 1–14.
134	CAn	Cocha Caranga Forest	2700	-79.1596	-4.04586	-55	109	Neotoma		Niemann, H., Behling, H., 2009. Late Pleistocene and Holocene environmental change inferred from the Cocha Caranga sediment and soil records in the southeastern Ecuadorian Andes. Palaeogeography, Palaeoclimatology, Palaeoecology 276, 1–14.
135	Amazonia	San Jorge	105	-73.195	-4.06333	-41	2437	Neotoma		Kelly, T.J., I.T. Lawson, K.H. Roucoux, T.R. Baker, T.D. Jones, and N.K. Sanderson. 2017. The vegetation history of an Amazonian domed peathland. Palaeogeography, Palaeoclimatology, Palaeoecology 468:129-141.
136	CAn	Valle Pequeño	2501	-79.1721	-4.11608	-57	1633	Neotoma		Rodríguez, F. 2012. Reconstruction of Late Quaternary landscape dynamics in the Podocarpus National Park region, southern Andes of Ecuador. Doctoral dissertation. Georg August University, GÃ¶ttingen, Germany.
137	CNAn	Valle Pequeno core	2501	-79.1721	-4.11608	-29	1558		Reading Palaeofire	Rodríguez, F., Behling, H., 2010. Late Holocene vegetation, fire, climate and upper forest line dynamics in the Podocarpus National Park, southeastern Ecuador. Vegetation History and Archaeobotany 20, 1–14.
138	CAn	Cajanuma valley	2985	-79.1569	-4.14972	-62	18124	Neotoma		Villota, A., and H. Behling. 2014. Late Glacial and Holocene environmental change inferred from the páramo of Cajanuma in the Podocarpus National Park, southern Ecuador. Caldasia 36(2):345-364.
139	NEB	GeoB 3910-2	-2337	-36.3503	-4.25028	12260	19630	Pangaea		Dupont, L.M., Schlütz, F., Ewah, C.T., Jennerjahn, T.C., Paul, A., Behling, H., 2009. Two-step vegetation response to enhanced precipitation in Northeast Brazil during Heinrich event 1. Glob. Chang. Biol. 16, 1647–1660.
140	CAn	Laguna Rabadilla de Vaca core	3355	-79.1121	-4.25547	204	11140	Neotoma	Reading Palaeofire	Niemann, H., Haberzettl, T., Behling, H., 2009. Holocene climate variability and vegetation dynamics inferred from the (11700 cal. yr BP) Laguna Rabadilla de Vaca sediment record, southeastern Ecuadorian Andes. The Holocene 19, 307–316.
141	CAn	Rabadilla de Vaca mire	3355	-79.1209	-4.25658	-55	2053.03	Neotoma		Rodríguez, F., and H. Behling. 2011. Late Holocene vegetation, fire, climate and upper forest line dynamics in the Podocarpus National Park, southeastern Ecuador. Vegetation History and Archaeobotany 20:1-14.
142	CNAn	Rabadilla de Vaca mire core	3355	-79.1209	-4.25658	-14	1958		Reading Palaeofire	Rodríguez, F., Behling, H., 2010. Late Holocene vegetation, fire, climate and upper forest line dynamics in the Podocarpus National Park, southeastern Ecuador. Vegetation History and Archaeobotany 20, 1–14.
143	CAn	Cerro Toledo CTB core	2990	-79.1115	-4.37461	-103	18086	Neotoma	Reading Palaeofire	Brunschön, C., Behling, H., 2009. Late Quaternary vegetation, fire and climate history reconstructed from two cores at Cerro Toledo, Podocarpus National Park, southeastern Ecuadorian Andes. Quaternary Research 72, 388–399.
144	CAn	Cerro Toledo	2990	-79.1115	-4.37461	74	6272	Neotoma		Rodríguez, F., Behling, H., 2012. Late Quaternary vegetation, climate and fire dynamics, and evidence of early to mid-Holocene Polylepis forests in the Jimbura region of the southernmost Ecuadorian Andes. Palaeogeography, Palaeoclimatology, Palaeoecology 350-352, 247–257.
145	CAn	Lagunas Natosas Bosque core	3458	-79.4241	-4.73042	54	14355	Neotoma	Reading Palaeofire	Rodríguez, F., Behling, H., 2012. Late Quaternary vegetation, climate and fire dynamics, and evidence of early to mid-Holocene Polylepis forests in the Jimbura region of the southernmost Ecuadorian Andes. Palaeogeography, Palaeoclimatology, Palaeoecology 350-352, 247–257.
146	Amazonia	Carajas	355	-50.16	-6	12	7747		Reading Palaeofire	Cordeiro, R.C., Turcq, B., Suguio, K., Oliveira da Silva, A., Sifeddine, A., Volkmer-Ribeiro, C., 2008. Holocene fires in East Amazonia (Carajás), new evidences, chronology and relation with paleoclimate. Global and Planetary Change 61, 49–62.
147	Amazonia	Carajas	643	-50.34	-6.33	58	54923	Manually extracted		Hermanowski, B., da Costa, M.L., Carvalho, A.T., Behling, H., 2012. Palaeoenvironmental dynamics and underlying climatic changes in southeast Amazonia (Serra Sul dos Carajás, Brazil) during the late Pleistocene and Holocene. Palaeogeogr. Palaeoclimatol. Palaeoecol. 365–366, 227–246.
148	CAn	Laguna de Chochos core	3557	-77.475	-7.63536	137	18133	Neotoma	Reading Palaeofire	Bush, M.B., Hansen, B.C.S., Rodbell, D.T., Seltzer, G.O., Young, K.R., León, B., Abbott, M.B., Silman, M.R., Gosling, W.D., 2005. A 17 000-year history of Andean climate and vegetation change from Laguna de Chochos, Peru. Journal of Quaternary Science 20, 703–714.
149	Amazonia	Humaitá	82	-63.782	-8.167	4	6337		Manually extracted	Cohen, M.C.L., Rossetti, D.F., Pessenda, L.C.R., Friaes, Y.S., Oliveira, P.E., 2014. Late Pleistocene glacial forest of Humaitá-Western Amazonia. Palaeogeogr. Palaeoclimatol. Palaeoecol. 415, 37–47.
150	NEB	Catimbau	690	-37.1889	-8.49056	-39	9688	Manually extracted		de Medeiros, V.B., de Oliveira, P.E., Santos, R.A., Barreto, A.M.F., de Oliveira, M.A.T., Pinaya, J.L.D., 2018. New holocene pollen records from the Brazilian Caatinga. An. Acad. Bras. Cienc. 90, 2011–2023.
151	Amazonia	Lago do Saci	218	-56.27	-9.116	1301	35064		Manually extracted	Cordeiro, R.C., Turcq, B., Moreira, L.S., Rodrigues, R. de A.R., Lamego Simões Filho, F.F., Martins, G.S., Santos, A.B., Barbosa, M., Guilles da Conceição, M.C., Rodrigues, R. de C., Evangelista, H., Moreira-Turcq, P., Penido, Y.P., Sifeddine, A., Seoane, J.C.S., 2014. Palaeofires in Amazon: Interplay between land use change and palaeoclimatic events. Palaeogeogr. Palaeoclimatol. Palaeoecol. 415,…
152	Amazonia	Lago do Saci	218	-56.27	-9.116	1222	33165	Manually extracted		Fontes, D., Cordeiro, R.C., Martins, G.S., Behling, H., Turcq, B., Sifeddine, A., Seoane, J.C.S., Moreira, L.S., Rodrigues, R.A., 2017. Paleoenvironmental dynamics in South Amazonia, Brazil, during the last 35,000 years inferred from pollen and geochemical records of Lago do Saci. Quat. Sci. Rev. 173, 161–180.
153	NEB	Saquinho core	490	-43.21	-10.4	378	13063	Manually extracted	Reading Palaeofire	de Oliveira, P.E., Barreto, A.M.F., Suguio, K., 1999. Late Pleistocene/Holocene climatic and vegetational history of the Brazilian caatinga: the fossil dunes of the middle São Francisco River. Palaeogeography, Palaeoclimatology, Palaeoecology 152, 319–337.
154	CEB	Confusão lake	182	-49.7169	-10.6336	89	6980	Manually extracted		Behling, H., 2002. Late Quaternary vegetation and climate dynamics in southeastern Amazonia inferred from Lagoa da Confusão Tocantins State, northern Brazil. Amazoniana 17, 27–39.
155	CAn	Laguna Huatacocha	4686	-76.6167	-10.7667	0	10616	Neotoma		Hansen, B.C.S., H.E. Wright, Jr., and J.P. Bradbury. 1984. Pollen studies in the Junín area, central Peruvian Andies. Geological Society of America Bulletin 95:1454-1465.
156	CAn	Laguna Junín	4103	-76.1667	-11	3344	36361	Neotoma		Hansen, B.C.S., H.E. Wright, Jr., and J.P. Bradbury. 1984. Pollen studies in the Junín area, central Peruvian Andies. Geological Society of America Bulletin 95:1454-1465.
157	-	Laguna Milloc	4657	-76.35	-11.5667	42	14613	Neotoma		Graf, K. 1992. Pollendiagramme aus den Anden: Eine Synthese zur Klimageschichte und Vegetationsentwicklung seit der letzten Eiszeit. Physische Geographie 34. Universität Zürich-Irchel, Geographisches Institut, Zürich, Switzerland.
158	CAn	Laguna Paca	3429	-75.5	-11.7167	0	5408	Neotoma		Hansen, B.C.S., G.O. Seltzer, and H.E. Wright, Jr. 1994. Late Quaternary vegetational change in the central Peruvian Andes. Palaeogeography, Palaeoclimatology, Palaeoecology 109:263-285.
159	Amazonia	Werth core	319	-69.23	-11.74	0	3137		Reading Palaeofire	Bush, M.B., Silman, M.R., Listopad, C.M.C.S., 2007. A regional study of Holocene climate change and human occupation in Peruvian Amazonia. Journal of Biogeography 34, 1342–1356.
160	CAn	Laguna Pomacocha	4479	-75.25	-11.75	-92	12747	Neotoma		Hansen, B.C.S., G.O. Seltzer, and H.E. Wright, Jr. 1994. Late Quaternary vegetational change in the central Peruvian Andes. Palaeogeography, Palaeoclimatology, Palaeoecology 109:263-285.
161	CAn	Laguna Jeronimo	4479	-75.2167	-11.7833	-105	13457	Neotoma		Hansen, B.C.S., G.O. Seltzer, and H.E. Wright, Jr. 1994. Late Quaternary vegetational change in the central Peruvian Andes. Palaeogeography, Palaeoclimatology, Palaeoecology 109:263-285.
162	Amazonia	Parker core	264	-69.02	-12.14	0	8422		Reading Palaeofire	Bush, M.B., Silman, M.R., Listopad, C.M.C.S., 2007. A regional study of Holocene climate change and human occupation in Peruvian Amazonia. Journal of Biogeography 34, 1342–1356.
163	Amazonia	Gentry core	265	-69.09	-12.17	0	8034		Reading Palaeofire	Bush, M.B., Silman, M.R., Listopad, C.M.C.S., 2007. A regional study of Holocene climate change and human occupation in Peruvian Amazonia. Journal of Biogeography 34, 1342–1356.
164	Amazonia	Vargas core	248	-68.89	-12.37	44	8101		Reading Palaeofire	Bush, M.B., Silman, M.R., Listopad, C.M.C.S., 2007. A regional study of Holocene climate change and human occupation in Peruvian Amazonia. Journal of Biogeography 34, 1342–1356.
165	Amazonia	Lago Rogaguado core	146	-65.9861	-12.9974	-41	7922	Neotoma	Reading Palaeofire	Brugger, S.O., E. Gobet, J.F.N. van Leeuwen, M.-P. Ledru, D. Colombaroli, W.O. van der Knaap, U. Lombardo, K. Escobar-Torrez, W. Finsinger, L. Rodrigues, A. Giesche, M. Zarate, H. Veit, and W. Tinner. 2016. Long-term man-environment interactions in the Bolivian Amazon: 8000 years of vegetation dynamics. Quaternary Science Reviews 132:114-128.
166	CAn	Lake Refugio 1	3149	-71.7083	-13.0919	-59	19060	Neotoma		Urrego, D.H., B.A. Niccum, C.F. La Drew, M.R. Silman, and M.B. Bush. 2011. Fire and drought as drivers of early Holocene tree line changes in the Peruvian Andes. Journal of Quaternary Science 26(1):28-36.
167	CAn	Lake Refugio 2	3149	-71.7053	-13.0949	-58	22108	Neotoma	Reading Palaeofire	Urrego, D.H., B.A. Niccum, C.F. La Drew, M.R. Silman, and M.B. Bush. 2011. Fire and drought as drivers of early Holocene tree line changes in the Peruvian Andes. Journal of Quaternary Science 26(1):28-36.
168	CAn	Lake Refugio 3	3149	-71.7032	-13.0992	-59	13363	Neotoma		Urrego, D.H., B.A. Niccum, C.F. La Drew, M.R. Silman, and M.B. Bush. 2011. Fire and drought as drivers of early Holocene tree line changes in the Peruvian Andes. Journal of Quaternary Science 26(1):28-36.
169	CNAn	Marcacocha core	4024	-72.2	-13.21	148	4004		Reading Palaeofire	Chepstow-Lusty, A.J., Bennett, K.D., Fjeldså, J., Kendall, A., Galiano, W., Tupayachi Herrera, A., 1998. Tracing 4,000 Years of environmental history in the Cuzco area, Peru, from the pollen record. Mountain Research and Development 18, 159.
170	Amazonia	Laguna Granja	142	-63.7103	-13.2634	0	6135	Neotoma		Carson, J.F., B.S. Whitney, F.E. Mayle, J. Iriarte, H. Prum̈ers, J.D. Soto, and J. Watling. 2014. Environmental impact of geometric earthwork construction in pre-Columbian Amazonia. Proceedings of the National Academy of Sciences of the United States of America 111(29):10497-10502.
171	Amazonia	Laguna Orícore	141	-63.528	-13.3483	0	5683	Neotoma		Carson, J.F., B.S. Whitney, F.E. Mayle, J. Iriarte, H. Prum̈ers, J.D. Soto, and J. Watling. 2014. Environmental impact of geometric earthwork construction in pre-Columbian Amazonia. Proceedings of the National Academy of Sciences of the United States of America 111(29):10497-10502.
172	CNAn	PAC-E	3427	-73.495	-13.6072	5732	19824		Reading Palaeofire	Valencia, B.G., Urrego, D.H., Silman, M.R., Bush, M.B., 2010. From ice age to modern: a record of landscape change in an Andean cloud forest. Journal of Biogeography 37, 1637–1647.
173	CAn	Laguna de Pacucha	3221	-73.3222	-13.6148	-56	25207	Neotoma		Hillyer, R., B.G. Valencia, M.B. Bush, M.R. Silman, and M. Steinitz-Kannan. 2009. A 24,700-yr paleolimnological history from the Peruvian Andes. Quaternary Research 71(1):71-82.
174	Amazonia	Laguna Bella Vista core	193	-61.55	-13.6167	54	56659	Neotoma	Reading Palaeofire	Burbridge, R.E., Mayle, F.E., Killeen, T.J., 2004. Fifty-thousand-year vegetation and climate history of Noel Kempff Mercado National Park, Bolivian Amazon. Quaternary Research 61, 215–230.
175	Amazonia	Lake Consuelo	924	-68.9916	-13.9513	5143	46627	Neotoma		Urrego Sanchez, D.H. 2006. Long-term vegetation and climate change in western Amazonia. Doctoral dissertation. Florida Institute of Technology, Melbourne, Florida, USA.
176	CEB	Chapada dos Veadeiros	1000	-47.5	-14	2020	18200	Manually extracted	Manually extracted	Ferraz-Vicentini, K. R.: História do Fogo no Cerrado: Uma Análise palinológica (PhD Dissertation), Universidade de Brasília, 1999.
177	Amazonia	Lake Chalalan core	396	-67.92	-14.42	247	15985	Neotoma	Reading Palaeofire	Urrego, D.H., 2006. Long-term Vegetation and Climate Change in Western Amazonia (PhD Dissertation). Biological Sciences. Florida Institute of Technology, Melbourne, FL.
178	Amazonia	Laguna Chaplin core LCH	171	-61.0667	-14.4667	-59	56152	Neotoma	Reading Palaeofire	Burbridge, R.E., Mayle, F.E., Killeen, T.J., 2004. Fifty-thousand-year vegetation and climate history of Noel Kempff Mercado National Park, Bolivian Amazon. Quaternary Research 61, 215–230.
179	Amazonia	Lake Santa Rosa core	350	-67.8764	-14.4849	167	16235	Neotoma	Reading Palaeofire	Urrego, D.H., M.B. Bush, M.R. Silman, B.A. Niccum, P. De la Rosa, C.H. McMichael, S. Hagen, and M. Palace. 2013. Holocene fires, forest stability and human occupation in south-western Amazonia. Journal of Biogeography 40(3):521-533.
180	CAn	Katantica	4935	-69.1833	-14.8	51	7719	Neotoma		Graf, K. 1992. Pollendiagramme aus den Anden: Eine Synthese zur Klimageschichte und Vegetationsentwicklung seit der letzten Eiszeit. Physische Geographie 34. Universität Zürich-Irchel, Geographisches Institut, Zürich, Switzerland.
181	CEB	Veredas das águas emendadas	1093	-47.7836	-14.8469	52	31678	Manually extracted	Manually extracted	Salgado-Labouriau, M.L., Barberi, M., Ferraz-Vicentini, K.R., Parizzi, M.G., 1998. A dry climatic event during the late Quaternary of tropical Brazil. Rev. Palaeobot. Palynol. 99, 115–129.
182	CEB	Emendas da Água	1100	-47.7836	-14.8469	1080	30480	Manually extracted	Manually extracted	Barberi, M., Salgado-Labouriau, M. L., and Suguio, K.: Paleovegetation and paleoclimate of “Vereda de Aguas Emendadas”, central Brazil, J. South Am. Earth Sci., 13, 241–254, https://doi.org/10.1016/S0895-9811(00)00022-5, 2000.
183	CAn	Cotapampa	4440	-69.1	-15.2167	-97	13060	Neotoma		Graf, K. DOI: 10.21233/n3589r
184	CAn	Amarete	3874	-68.9833	-15.2333	0	9321	Neotoma		Graf, K. 1992. Pollendiagramme aus den Anden: Eine Synthese zur Klimageschichte und Vegetationsentwicklung seit der letzten Eiszeit. Physische Geographie 34. Universität Zürich-Irchel, Geographisches Institut, Zürich, Switzerland.
185	Amazonia	Pontes e Lacerda core	273	-59.21	-15.26	39	12694		Reading Palaeofire	Marques Gouveia, S.E., Ruiz Pessenda, L.C., Aravena, R., Boulet, R., Scheel-Ybert, R., Bendassoli, J.A., de Souza Ribeiro, A., de Freitas, H.A., 2002. Carbon isotopes in charcoal and soils in studies of paleovegetation and climate changes during the late Pleistocene and the Holocene in the southeast and centerwest regions of Brazil. Global and Planetary change 33, 95–106.
186	CEB	Lagoa Feia	915	-47.3014	-15.5681	-35	15331	Manually extracted	Manually extracted	Cassino, R.F., Ledru, M.P. and fire variability in the central C. (Brazil) during the P.-H. transition was influenced by oscillations in the S. boundary belt, Santos, R. de A., Favier, C., 2020. Vegetation and fire variability in the central Cerrados (Brazil) during the Pleistocene-Holocene transition was influenced by oscillations in the SASM boundary belt. Quat. Sci. Rev.
187	CEB	Lagoa Bonita	960	-47.69	-15.58	3260	23760	Manually extracted		Barberi, M.: Mudanças paleoambientais na região dos cerrados do planalto central durante o quaternário tardio: o estudo da lagoa bonita (DF), University of São Paulo, 210 pp., https://doi.org/https://doi.org/10.11606/T.44.2001.tde-04112015-161453, 2001.
188	Amazonia	Yaguaru core	195	-63.21	-15.6	0	4924		Reading Palaeofire	Taylor, Z.P., 2005. Environmental History at Laguna Yaguarú, Bolivia: Evidence from Pollen, Stable Carbon Isotopes, and an Embedded Mineral Facies (MSc thesis). University of Tennessee, Knoxville, Tennessee, USA.
189	-	Coropuna peat bog	4673	-72.6994	-15.6163	38	9476	Neotoma		Kuentz, A., M.-P. Ledru, and J.-C. Thouret. 2012. Environmental changes in the highlands of the western Andean Cordillera, southern Peru, during the Holocene. The Holocene 22(11):1215-1226.
190	CNAn	Lake Titicaca core NE98-1PC	3815	-69.2053	-16.2053	444	6193		Reading Palaeofire	Paduano, G.M., Bush, M.B., Baker, P.A., Fritz, S.C., Seltzer, G.O., 2003. A vegetation and fire history of Lake Titicaca since the Last Glacial Maximum. Palaeogeography, Palaeoclimatology, Palaeoecology 194, 259–279.
191	CAn	Nevado Sabancaya	4306	-71.0833	-16.2167	6355	12648	Neotoma		Graf, K. DOI: 10.21233/n3194z
192	CAn	Cerro Calvario	3992	-68.5	-16.25	4630	8361	Neotoma		Graf, K. 1992. Pollendiagramme aus den Anden: Eine Synthese zur Klimageschichte und Vegetationsentwicklung seit der letzten Eiszeit. Physische Geographie 34. Universität Zürich-Irchel, Geographisches Institut, Zürich, Switzerland.
193	CAn	Lago Huiñaimarca LT01-3B	3815	-68.727	-16.2841	-3	225988	Neotoma		Gosling, W.D., M.B. Bush, J.A. Hanselman, and A. Chepstow-Lusty. 2008. Glacial-interglacial changes in moisture balance and the impact on vegetation in the southern hemisphere tropical Andes (Bolivia/Peru). Palaeogeography, Palaeoclimatology, Palaeoecology 259(1):35-50.
194	CAn	Cumbre Unduavi	4703	-68.0417	-16.35	-219	27904	Neotoma		Graf, K. 1992. Pollendiagramme aus den Anden: Eine Synthese zur Klimageschichte und Vegetationsentwicklung seit der letzten Eiszeit. Physische Geographie 34. Universität Zürich-Irchel, Geographisches Institut, Zürich, Switzerland.
195	CAn	Chacaltaya 1	4792	-68.15	-16.3667	89	7655	Neotoma		Graf, K. 1992. Pollendiagramme aus den Anden: Eine Synthese zur Klimageschichte und Vegetationsentwicklung seit der letzten Eiszeit. Physische Geographie 34. Universität Zürich-Irchel, Geographisches Institut, Zürich, Switzerland.
196	CAn	Chacaltaya 2	4792	-68.15	-16.3667	0	10920	Neotoma		Graf, K. 1992. Pollendiagramme aus den Anden: Eine Synthese zur Klimageschichte und Vegetationsentwicklung seit der letzten Eiszeit. Physische Geographie 34. Universität Zürich-Irchel, Geographisches Institut, Zürich, Switzerland.
197	CAn	Laguna Salinas	4334	-71.15	-16.4	0	14732	Neotoma		Graf, K. DOI: 10.21233/n3bp82
198	CAn	Río Kaluyo	4244	-68.1333	-16.4333	136	10323	Neotoma		Graf, K. 1992. Pollendiagramme aus den Anden: Eine Synthese zur Klimageschichte und Vegetationsentwicklung seit der letzten Eiszeit. Physische Geographie 34. Universität Zürich-Irchel, Geographisches Institut, Zürich, Switzerland.
199	CAn	Monte Blanco	4879	-67.35	-17.025	38	1273	Neotoma		Graf, K. 1992. Pollendiagramme aus den Anden: Eine Synthese zur Klimageschichte und Vegetationsentwicklung seit der letzten Eiszeit. Physische Geographie 34. Universität Zürich-Irchel, Geographisches Institut, Zürich, Switzerland.
200	CEB	Vereda São José	709	-45.1114	-17.0793	56	15749	Neotoma	Manually extracted	Cassino, R.F., C.T. Martinho, and S.A.F. da Silva Caminha. 2018. A Late Quaternary palynological record of a palm swamp in the Cerrado of central Brazil interpreted using modern analog data. Palaeogeography, Palaeoclimatology, Palaeoecology 490:1-16.
201	CEB	Crominia core	708	-49.41	-17.27	5113	39607	Manually extracted	Reading Palaeofire	Salgado-Labouriau, M.L., Casseti, V., Ferraz-Vicentini, K.R., Martin, L., Soubiès, F., Suguio, K., Turcq, B., 1997. Late Quaternary vegetational and climatic changes in cerrado and palm swamp from Central Brazil. Palaeogeography, Palaeoclimatology, Palaeoecology 128, 215–226.
202	CEB	Urbano swamp	650	-45.1	-17.3	1500	13120	Manually extracted		Lorente, F. L. and Meyer, K. E. B.: Palinomorfos da vereda da Fazenda Urbano, município de Buritizeiro, Minas Gerais, Brasil, Iheringia - Ser. Bot., 65, 133–169, 2010.
203	CAn	Cala Conto	2710	-65.9333	-17.5667	10077	36533	Neotoma		Graf, K. 1992. Pollendiagramme aus den Anden: Eine Synthese zur Klimageschichte und Vegetationsentwicklung seit der letzten Eiszeit. Physische Geographie 34. Universität Zürich-Irchel, Geographisches Institut, Zürich, Switzerland.
204	CNAn	Siberia 93-1	2636	-64.7189	-17.8333	4652	53543		Reading Palaeofire	Mourguiart, P., Ledru, M.-P., 2003. Last glacial maximum in an Andean cloud forest environment (Eastern Cordillera, Bolivia). Geology 31, 195–198.
205	CEB	Lago do Pires	407	-42.2167	-17.95	199	10921	Neotoma	Reading Palaeofire	Behling, H., 1995. A high resolution Holocene pollen record from Lago do Pires, SE Brazil: vegetation, climate and fire history. Journal of Paleolimnology 14, 253–268.
206	CEB	Lagoa Nova core	438	-42.2	-17.95	95	10796	Manually extracted	Reading Palaeofire	Behling, H., 2003. Late Glacial and Holocene vegetation, climate and fire history inferred from Lagoa Nova in the southeastern Brazilian lowland. Vegetation History and Archaeobotany 12, 263–270.
207	CEB	Lago Aleixo	406	-42.1189	-17.9878	-54	9253	Manually extracted		Enters, D., Behling, H., Mayr, C., Dupont, L., Zolitschka, B., 2010. Holocene environmental dynamics of south-eastern Brazil recorded in laminated sediments of Lago Aleixo. J. Paleolimnol. 44, 265–277.
208	-	Laguna Mandioré	90	-57.5627	-18.0918	-30	11248	Neotoma		Plumpton, H.J., F.E. Mayle, and B.S. Whitney. 2019. Long-term impacts of mid-Holocene drier climatic conditions on Bolivian tropical dry forests. Quaternary Research.
209	CAn	Sajama	4338	-68.8833	-18.1667	0	4397	Neotoma		Ybert, J.P., and Y. Miranda. 1984. Analisis palinologico de un corte del Sajama. Actas II Congreso Geologico Bolivia, 691-694.
210	CAn	Ajata	4796	-69.2	-18.25	0	2839	Neotoma		Graf, K. DOI: 10.21233/n36t1j
211	CEB	Pau de Fruta mire	1396	-43.6752	-18.2575	-51	9595	Manually extracted		Horák-Terra, I., Martínez Cortizas, A., da Luz, C.F.P., Rivas López, P., Silva, A.C., Vidal-Torrado, P., 2015. Holocene climate change in central-eastern Brazil reconstructed using pollen and geochemical records of Pau de Fruta mire (Serra do Espinhaço Meridional, Minas Gerais). Palaeogeogr. Palaeoclimatol. Palaeoecol. 437, 117–131.
212	-	Quebrada La Higuera	3473	-69.5452	-18.662	-7	0	Neotoma		Mujica, M.-I., C. Latorre, A. Maldonado, L. González-Silvestre, R. Pinto, R. de Pol-Holz, and C.M. Santoro. 2014. Late Quaternary climate change, relict populations and present-day refugia in the northern Atacama Desert: a case 1 study from Quebrada La Higuera (18Â° S). Journal of Biogeography.
213	CEB	Serra Negra	1083	-46.8889	-18.9097	223	86927	Manually extracted		De Oliveira, P.E., Raczka, M., McMichael, C.N.H., Pinaya, J.L.D., Bush, M.B., 2020. Climate change and biogeographic connectivity across the Brazilian cerrado. J. Biogeogr. 47, 396–407
214	CEB	Lagoa Campestre de Salitre	1054	-46.7667	-19	2380	65511	Neotoma		Ledru, M.-P., H. Behling, M. Fournier, L. Martin, and M. Servant. 1994. Localisation de la forêt d'Araucaria du Brésil au cours de l'HolocÃ¨ne. Implications paléoclimatiques. C.R. Acad. Sci. Paris 317:517-521.
215	SESA	Nativo do Flamengo	31	-39.9395	-19.1635	-64	6304	Neotoma		Buso Jr, A.A., L.C.R. Pessenda, F.E. Mayle, F.L. Lorente, C. Volkmer-Ribeiro, J.A. Schiavo, M.G. Pereira, J.A. Bendassolli, K.C.D. Macario, and G.S. Siqueira. 2019. Paleovegetation and paleoclimate dynamics during the last 7000 years in the Atlantic forest of Southeastern Brazil based on palynology of a waterlogged sandy soil. Review of Palaeobotany and Palynology 264:1-10.
216	CEB	Lagoa Santa	784	-43.9003	-19.6336	546	6175	Manually extracted		Salgado-Labouriau, M.L., Barberi, M., Ferraz-Vicentini, K.R., Parizzi, M.G., 1998. A dry climatic event during the late Quaternary of tropical Brazil. Rev. Palaeobot. Palynol. 99, 115–129
217	CEB	Lagoa dos Olhos	801	-43.867	-19.6336	43	23399	Manually extracted		De Oliveira, P. E. 1992. A Palynological Record of Late Quaternary Vege- tational and Climatic Change in Southeastern Brazil. Ph.D. thesis, Ohio State University, Columbus, Ohio, U.S.A
218	SESA	GeoB3229-2	-766	-38.7169	-19.6347	4741	84199	Manually extracted		Behling, H., Arz, H.W., Pätzold, J., Wefer, G., 2002. Late Quaternary vegetational and climate dynamics in southeastern Brazil, inferences from marine cores GeoB 3229-2 and GeoB 3202-1. Palaeogeogr. Palaeoclimatol. Palaeoecol. 179, 227–243.
219	CEB	Lagoa Mares	720	-43.98	-19.68	0	23000	Manually extracted		Raczka, M. F., Bush, M. B., and De Oliveira, P. E.: The collapse of megafaunal populations in southeastern Brazil, Quat. Res. (United States), 89, 103–118, https://doi.org/10.1017/qua.2017.60, 2018.
220	CEB	Catas Altas core	756	-43.3667	-20.0833	12592	51064		Reading Palaeofire	Behling, H., Lichte, M., 1997. Evidence of dry and cold climatic conditions at glacial times in tropical southeastern Brazil. Quaternary Research 48, 348–358.
221	SESA	GeoB3202-1	-1136	-39.9686	-21.6169	14392	64600	Manually extracted		Behling, H., Arz, H.W., Pätzold, J., Wefer, G., 2002. Late Quaternary vegetational and climate dynamics in southeastern Brazil, inferences from marine cores GeoB 3229-2 and GeoB 3202-1. Palaeogeogr. Palaeoclimatol. Palaeoecol. 179, 227–243.
222	-	Toconce	3604	-68.1425	-22.2455	0	0	Neotoma		Jara, I.A., A. Maldonado, and M.E. De Porras. 2022. Did modern precipitation drivers influence centennial trends in the highlands of the Atacama Desert during the most recent millennium?. Geophysical Research Letters 49(1):1-13. https://agupubs.onlinelibrary.wiley.com/doi/abs/10.1029/2021GL095927.
223	SESA	AN core	2118	-44.6698	-22.3853	6	7563	Manually extracted	Reading Palaeofire	Behling, H., Jantz, N., Safford, H.D., 2020. Mid-and late Holocene vegetation, climate and fire dynamics in the Serra do Itatiaia, Rio de Janeiro State, southeastern Brazil. Review of Palaeobotany and Palynology 274, 104152.
224	SESA	Serra dos Órgãos	1567	-43.0281	-22.4583	15	12488	Manually extracted	Manually extracted	Jeske-Pieruschka, V., Pillar, V.D., de Oliveira, M.A.T., Behling, H., 2013. New insights into vegetation, climate and fire history of southern Brazil revealed by a 40,000 year environmental record from the State Park Serra do Tabuleiro. Veg. Hist. Archaeobot. 22, 299–314.
225	SESA	Morro de Itapeva core	1753	-45.57	-22.78	-43	23282	Neotoma	Reading Palaeofire	Behling, H., 1997. Late Quaternary vegetation, climate and fire history from the tropical mountain region of Morro de Itapeva, SE Brazil. Palaeogeography, Palaeoclimatology, Palaeoecology 129, 407–422.
226	SESA	Botucatu BOT profile	602	-48	-23.18	222	8794		Reading Palaeofire	Ruiz Pessenda, L.C., Marques Gouveia, S.E., Aravena, R., Boulet, R., Valencia, E.P.E., 2004. Holocene fire and vegetation changes in southeastern Brazil as deduced from fossil charcoal and soil carbon isotopes. Quaternary International 114, 35–43.
227	-	Tumbre 1	4091	-67.7833	-23.3167	247	7500	Neotoma		Ybert, J.P., and Y. Miranda. 1984. Analisis palinologico de un corte del Sajama. Actas II Congreso Geologico Bolivia, 691-694.
228	-	Laguna Miscanti	4162	-67.7756	-23.725	87.34	13604.2	Neotoma		Grosjean, M., J.F.N. van Leeuwen, W.O. van der Knaap, M.A. Geyh, B. Ammann, W. Tanner, B. Messerli, L.A. Nuñez, B.L. Valero-Garcés, and H. Veit. 2001. A 22,000 14C year BP sediment and pollen record of climate change from Laguna Miscanti (23Â°S), northern Chile. Global and Planetary Change 28:35-51.
229	-	Aguilar	3972	-65.75	-23.8333	0	9822	Neotoma		Markgraf, V. 1985. Paleoenvironemtal history of the last 10,000 years in northwestern Argentina. Zentralblatt Geologie Palaeontologie 11/12:1739-1749.
230	SESA	Colonia	779	-46.7075	-23.8675	-262	215952	Pangaea	Pangaea	Rodríguez-Zorro, P.A., Ledru, M.-P., Bard, E., Aquino-Alfonso, O., Camejo, A., Daniau, A.-L., Favier, C., Garcia, M., Mineli, T.D., Rostek, F., Ricardi-Branco, F., 2020. Shut down of the South American summer monsoon during the penultimate glacial. Scientific Reports 10, 1–11.
231	SESA	Colonia core	779	-46.7056	-23.8675	149	108500	Neotoma		Rodríguez-Zorro, P.A., M.-P. Ledru, E. Bard, O. Aquino-Alfonso, A. Camejo, A.-L. Daniau, C. Favier, M. Garcia, T.D. Mineli, F. Rostek, F. Ricardi-Branco, A.O. Sawakuchi, Q. Simon, K. Tachikawa, and N. Thouveny. 2020. Shut down of the South American summer monsoon during the penultimate glacial. Scientific Reports 10(6275).
232	-	Tuyajto	3969	-67.7833	-23.95	1045	14894	Neotoma		Ybert, J.P., and Y. Miranda. 1984. Analisis palinologico de un corte del Sajama. Actas II Congreso Geologico Bolivia, 691-694.
233	SESA	Serra Campos Gerais core	1161	-50.2167	-24.6667	-45	14554	Neotoma	Reading Palaeofire	Behling, H., 1997. Late Quaternary vegetation, climate and fire history of the Araucaria forest and campos region from Serra Campos Gerais, Paraná State (South Brazil). Review of Palaeobotany and Palynology 97, 109–121.
234	SESA	Aracatuba	1246	-48.98	-25.92	0	14635	Manually extracted	Reading Palaeofire	Behling, H., 2007. Late Quaternary vegetation, fire and climate dynamics of Serra do Araçatuba in the Atlantic coastal mountains of Paraná State, southern Brazil. Vegetation History and Archaeobotany 16, 77–85.
235	SESA	Volta Velha	15	-48.6336	-26.0669	955	26081	Manually extracted		Behling, H., Negrelle, R.R.B., 2001. Tropical rain forest and climate dynamics of the Atlantic lowland, Southern Brazil, during the late Quaternary. Quat. Res. 56, 383–389.
236	-	São Francisco do Sul Bay	138	-48.788	-26.113	-68	2554	Neotoma		Rodrigues, E., M.C.L. Cohen, L.C.R. Pessenda, M.C. França, E. Magalhães, and Q. Yao. 2022. Poleward mangrove expansion in South America coincides with MCA and CWP: A diatom, pollen, and organic geochemistry study. Quaternary Science Reviews 288:in press.
237	SESA	Poço Grande	11	-48.8667	-26.4167	-39	4839	Neotoma		Behling, H. 1993. Untersuchungen zur spätpleistozänen und holozänen Vegetations- und Klimageschichte der tropischen Küstenwälder und der Araukarienwälder in Santa Catarina (Südbrasilien). Dissertationes Botanicae 206. J Cramer, Berlin Stuttgart, Germany.
238	SESA	GeoB2107-3	-836	-46.7503	-27.3003	582	79869	Pangaea		Gu, F., Zonneveld, K.A.F., Chiessi, C.M., Arz, H.W., Pätzold, J., Behling, H., 2017. Long-term vegetation, climate and ocean dynamics inferred from a 73,500 years old marine sediment core (GeoB2107-3) off southern Brazil. Quat. Sci. Rev. 172, 55–71.
239	SESA	Serra da Boa Vista	1022	-49.15	-27.7	-41	17999	Neotoma		Behling, H. 1993. Untersuchungen zur spätpleistozänen und holozänen Vegetations- und Klimageschichte der tropischen Küstenwälder und der Araukarienwälder in Santa Catarina (Südbrasilien). Dissertationes Botanicae 206. J Cramer, Berlin Stuttgart, Germany.
240	SESA	Santa Catarina Island	82	-48.529	-27.777	-57	6622	Neotoma		Kuhn, L.A., K.A.F. Zonneveld, P.A. Souza, and R.R. Cancelli. 2023. Late Quaternary palaeoenvironmental evolution and sea level oscillation of the Santa Catarina Island (southern Brazil). Biogeosciences in press.
241	SESA	Serra do Tabuleiro	916	-48.8681	-27.8968	-4	43127	Manually extracted	Manually extracted	Behling, H., Safford, H.D., 2010. Late-glacial and Holocene vegetation, climate and fire dynamics in the Serra dos Órgãos, Rio de Janeiro State, southeastern Brazil. Glob. Chang. Biol. 16, 1661–1671. https://doi.org/10.1111/j.1365-2486.2009.02029.x
242	SESA	Morro da Igreja	1365	-49.8667	-28.1833	-39	10386	Neotoma		Behling, H. 1995. Investigations into the Late Pleistocene and Holocene history of vegetation and climate in Santa Catarina (S Brazil). Vegetation History and Archaeobotany 4:127-152.
243	SESA	Rincão das Cabritas	972	-50.5728	-28.4764	-8	16348	Manually extracted	Manually extracted	Jeske-Pieruschka, V., Behling, H., 2012. Palaeoenvironmental history of the São Francisco de Paula region in southern Brazil during the late Quaternary inferred from the Rincão das Cabritas core. Holocene 22, 1251–1262
244	SESA	Serra do Rio Rastro	313	-49.55	-28.55	800	11014	Neotoma		Behling, H. 1993. Untersuchungen zur spätpleistozänen und holozänen Vegetations- und Klimageschichte der tropischen Küstenwälder und der Araukarienwälder in Santa Catarina (Südbrasilien). Dissertationes Botanicae 206. J Cramer, Berlin Stuttgart, Germany.
245	SESA	Cambara do Sul core	1056	-50.1011	-29.0525	-50	45816	Manually extracted	Reading Palaeofire	Behling, H., Pillar, V.D., Orlóci, L., Girardi Bauermann, S., 2004. Late Quaternary Araucaria forest, grassland (Campos), fire and climate dynamics, studied by high-resolution pollen, charcoal and multivariate analysis of the Cambará do Sul core in southern Brazil. Palaeogeography, Palaeoclimatology, Palaeoecology 203, 277–297.
246	SESA	Fazendo do Pinto core	835	-50.56	-29.4	21	2564		Reading Palaeofire	Behling, H., Girardi Bauermann, S., Pereira Neves, P.C., 2001. Holocene environmental changes in the São Francisco de Paula region, southern Brazil. Journal of South American Earth Sciences 14, 631–639.
247	SESA	Alpes de São Francisco	671	-50.6217	-29.4931	2924	29669	Manually extracted		Leonhardt, A., Lorscheitter, M.L., 2010. The last 25,000 years in the Eastern Plateau of Southern Brazil according to Alpes de São Francisco record. J. South Am. Earth Sci. 29, 454–463
248	SESA	Sao Francisco de Assis core	113	-55.21	-29.58	33	23726	Manually extracted	Reading Palaeofire	Behling, H., Pillar, V.D., Girardi Bauermann, S., 2005. Late Quaternary grassland (Campos), gallery forest, fire and climate dynamics, studied by pollen, charcoal and multivariate analysis of the São Francisco de Assis core in western Rio Grande do Sul (southern Brazil). Review of Palaeobotany and Palynology 133, 235–248.
249	-	Salina 2	2599	-69.3333	-32.25	100	6507	Neotoma		Markgraf, V. 1983. Late and postglacial vegetational and paleoclimatic changes in subantarctic, temperate, and arid environments in Argentina. Palynology 7(1):43-70.
250	SESA	GeoB6211-2	-664	-50.24	-32.5	89	19228	Pangaea		Gu, F., Chiessi, C.M., Zonneveld, K.A.F., Behling, H., 2018. Late Quaternary environmental dynamics inferred from marine sediment core GeoB6211-2 off southern Brazil. Palaeogeogr. Palaeoclimatol. Palaeoecol. 496, 48–61.
251	SAn	Laguna Aculeo core	493	-70.91	-33.8333	-40	7446	Manually extracted	Reading Palaeofire	Villa-Martínez, R., Villagrán, C., Jenny, B., 2003. The last 7500 cal yr B.P. of westerly rainfall in Central Chile inferred from a high-resolution pollen record from Laguna Aculeo (34({}^circ)S). Quaternary Research 60, 284–293.
252	SAn	Tagua Tagua core	274	-71.16	-34.5	598	58113		Reading Palaeofire	Heusser, C.J., 1990. Ice age vegetation and climate of subtropical Chile. Palaeogeography, Palaeoclimatology, Palaeoecology 80, 107–127.
253	SAn	Laguna El Sosneado	2346	-69.9179	-34.8435	24	2215	Neotoma	Neotoma	Nanavati, W., C. Whitlock, M.E. de Porras, A. Gil, D. Navarro, and G. Neme. 2022. Disentangling the last 1,000 years of human-environment interactions along the eastern side of the southern Andes (34-52 S Lat.). Proceedings of the National Academies of Sciences 119.
254	SAn	Salado	1803	-69.75	-35.3333	22	4321	Neotoma		Markgraf, V. 1983. Late and postglacial vegetational and paleoclimatic changes in subantarctic, temperate, and arid environments in Argentina. Palynology 7(1):43-70.
255	SAn	Laguna del Maule	2170	-70.5152	-36.0643	-65	728	Neotoma		Carrevedo, M.L., M. Frugone, C. Latorre, A. Maldonado, P. Bernárdez, R. Prego, D. Cárdenas, and B. Valero-Garcés. 2015. A 700-year record of climate and environmental change from a high Andean lake: Laguna del Maule, central Chile (36Â°S). The Holocene 25(6):956-972.
256	SAn	Veranada Vulkanpickel	3224	-70.4167	-36.6833	39	7783	Neotoma		Schäbitz, F. 1989. Untersuchungen zum aktuellen Pollenniederschlag und zur holozänen Klima- und Vegetationsentwicklung in den Anden Nord-Neuquéns, Argentinien. Bamberger Geographische Schriften 8. Bamberg, Germany.
257	SAn	Mallín Vaca Lauquen	1615	-71.0485	-36.858	-13	16154	Neotoma	Neotoma	Markgraf, V., C. Whitlock, R.S. Anderson, and A. Garcia. 2009. Late Quaternary vegetation and fire history in the northernmost Nothofagus forest region: Mallin Vaca Lauquen, Neuquen Province, Argentina. Journal of Quaternary Science 24(3):248-258.
258	SAn	Mallín Vaca Lauquen	1615	-71.0489	-36.8585	0	11258	Neotoma		Markgraf, V. 1987. Paleoenvironmental changes at the northern limit of the subantarctic Nothofagus forest, latitude 37Â°S, Argentina. Quaternary Research 28:119-129.
259	SAn	Veranada Pelan	1880	-70.3833	-36.8833	5	10890	Neotoma		Schäbitz, F. 1989. Untersuchungen zum aktuellen Pollenniederschlag und zur holozänen Klima- und Vegetationsentwicklung in den Anden Nord-Neuquéns, Argentinien. Bamberger Geographische Schriften 8. Bamberg, Germany.
260	SAn	Laguna Portezuelo	1680	-71.0408	-37.9118	12	11273	Neotoma	Neotoma	Nanavati, William. 2020. Disentangling Anthropogenic and Natural Drivers of Change in Vegetation and Fire History Along the Forest-grassland Ecotones of the Central United States and Patagonia. Doctoral dissertation. Montana State University, Bozeman, Montana, U.S.A.
261	SAn	Cueva Haichol	1151	-70.6667	-38.5833	-19	7856	Neotoma		Markgraf, V. 1988/90. Analisis palinologicos de los sedimentos. In J.C. Fernandez, editor. Arqueologia de la Cueva Haichol. Anales de Arqueologia y Etnologia 43/45:97-102.
262	-	Salina Anzoátegui	16	-63.775	-39.0064	9	10353	Neotoma		Schäbitz, F. 1994. Holocene climatic variations in northern Patagonia, Argentina. Palaeogeography, Palaeoclimatology, Palaeoecology 109:287-294.
263	SAn	Caunahue	946	-72	-40	2810	19239	Neotoma		Markgraf, V. 1991. Younger Dryas in southern South America?. Boreas 20(1):63-69.
264	-	Salina Piedra	-5	-62.6739	-40.5831	0	4247	Neotoma		Schäbitz, F. 1994. Holocene climatic variations in northern Patagonia, Argentina. Palaeogeography, Palaeoclimatology, Palaeoecology 109:287-294.
265	SAn	Primavera	950	-71.1833	-40.6667	1835	4375	Neotoma		Markgraf, V., J. Betancourt, and K. Rylander. 1996 (in prep) Amberat middens from Rio Limay, Neuquen Province, Argentina.
266	SAn	Encantado	903	-71.1333	-40.6667	295	1260	Neotoma		Markgraf, V., J. Betancourt, and K. Rylander. 1996 (in prep) Amberat middens from Rio Limay, Neuquen Province, Argentina.
267	SAn	Lago Llanquihue	166	-72.9	-40.9333	8414	23788		Reading Palaeofire	Moreno, P.I., 1993. Vegetation and Climate near Lago Llanquihue in the Chilean Lake District (MSc thesis). University of Maine, Orono, Maine, USA.
268	SAn	Canal de la Puntilla core	166	-72.905	-40.9525	9248	23780	Neotoma	Reading Palaeofire	Moreno, P.I., 1997. Vegetation and climate near Lago Llanquihue in the Chilean Lake District between 20200 and 9500 (^{14})C yr BP. Journal of Quaternary Science 12, 485–500.
269	SAn	Lago Moreno	813	-71.5167	-41.0583	1681	14596	Neotoma		Valencio, D.A., A.M. Sinito, K.M. Creer, M.M. Mazzoni, M.S. Alonso, and V. Markgraf. 1985. Palaeomagnetism, sedimentology, radiocarbon age determinations and palynology of the Llao Llao area, southwestern Argentina (lat. 41Â°S, long. 71Â°30'W): palaeolimnological aspects. Quaternary of South America and Antarctic Peninsula 3:109-148.
270	SAn	Trebol Lake core	810	-71.49	-41.07	-52	17674		Reading Palaeofire	Whitlock, C., Bianchi, M.M., Bartlein, P.J., Markgraf, V., Marlon, J., Walsh, M., McCoy, N., 2006. Postglacial vegetation, climate, and fire history along the east side of the Andes (lat 41–42.5°S), Argentina. Quaternary Research 66, 187–201.
271	SAn	Laguna el Trébol	810	-71.4945	-41.071	-20	20444	Neotoma		Iglesias, V., C. Whitlock, V. Markgraf, and M.M. Bianchi. 2014. Postglacial history of the Patagonian forest/steppe ecotone (41â€”43Â°S). Quaternary Science Reviews 94:120-135.
272	SAn	Pichilaguna	121	-73.0588	-41.2488	-16	21197	Manually extracted	Manually extracted	Moreno, P.I., Videla, J., Valero-Garcés, B., Alloway, B. V., Heusser, L.E., 2018. A continuous record of vegetation, fire-regime and climatic changes in northwestern Patagonia spanning the last 25,000 years. Quat. Sci. Rev. 198, 15–36.
273	SAn	Lago Mascardi-Gutierrez	1228	-71.4667	-41.25	129	10163	Neotoma		Markgraf, V. 1983. Late and postglacial vegetational and paleoclimatic changes in subantarctic, temperate, and arid environments in Argentina. Palynology 7(1):43-70.
274	SAn	Mallin Book	1039	-71.5833	-41.3333	103	17046	Neotoma		Markgraf, V. 1983. Late and postglacial vegetational and paleoclimatic changes in subantarctic, temperate, and arid environments in Argentina. Palynology 7(1):43-70.
275	SAn	Laguna Padre Laguna	902	-71.5093	-41.3599	-61	5304	Neotoma		Iglesias, V., C. Whitlock, V. Markgraf, and M.M. Bianchi. 2014. Postglacial history of the Patagonian forest/steppe ecotone (41â€”43Â°S). Quaternary Science Reviews 94:120-135.
276	SAn	Lago Huala Hué	726	-71.5083	-41.5112	-57	13378	Neotoma		Iglesias, V., C. Whitlock, V. Markgraf, and M.M. Bianchi. 2014. Postglacial history of the Patagonian forest/steppe ecotone (41â€”43Â°S). Quaternary Science Reviews 94:120-135.
277	SAn	Cordón Serrucho Norte wetland	871	-71.4288	-41.7518	-50	16621	Neotoma		Markgraf, V., V. Iglesias, and C. Whitlock. 2013. Late and postglacial vegetation and fire history from Cordón Serrucho Norte, northern Patagonia. Palaeogeography, Palaeoclimatology, Palaeoecology 371:109-118.
278	SAn	Lago Proschle	68	-72.7772	-41.8686	43	17511	Manually extracted	Manually extracted	Moreno, P.I., 2020. Timing and structure of vegetation, fire, and climate changes on the Pacific slope of northwestern Patagonia since the last glacial termination. Quat. Sci. Rev. 238, 106328
279	SAn	Laguna del Cóndor	907	-71.2901	-42.3522	-51	10443	Neotoma		Iglesias, V., C. Whitlock, M.M. Bianchi, G. Villarosa, and V. Outes. 2012. Holocene climate variability and environmental history at the Patagonian forest/steppe ecotone: Lago Mosquito (42°29'37.89"S, 71°24'14.57"W) and Laguna del Cóndor (42Â°20'47.22"S, 71Â°17'07.62"W). The Holocene 22(11):1297-1307.
280	SAn	Lago Mosquito	694	-71.4018	-42.4918	7	9516	Neotoma		Iglesias, V., C. Whitlock, M.M. Bianchi, G. Villarosa, and V. Outes. 2012. Holocene climate variability and environmental history at the Patagonian forest/steppe ecotone: Lago Mosquito (42Â°29'37.89"S, 71Â°24'14.57"W) and Laguna del Cóndor (42Â°20'47.22"S, 71Â°17'07.62"W). The Holocene 22(11):1297-1307.
281	SAn	Lepue core	159	-73.7121	-42.8048	-51	18125		Reading Palaeofire	Pesce, O.H., Moreno, P.I., 2014. Vegetation, fire and climate change in central-east Isla Grande de Chiloé (43(^circ)S) since the Last Glacial Maximum, northwestern Patagonia. Quaternary Science Reviews 90, 143–157.
282	SAn	Laguna la Zeta core	778	-71.3494	-42.8902	-39	20422		Reading Palaeofire	Iglesias, V., Whitlock, C., Markgraf, V., Bianchi, M.M., 2014. Postglacial history of the Patagonian forest/steppe ecotone (41–43(^circ)S). Quaternary Science Reviews 94, 120–135.
283	SAn	Lago Theobald core	696	-71.5622	-43.4376	-54	11603	Neotoma	Reading Palaeofire	Iglesias, V., C. Whitlock, V. Markgraf, and M.M. Bianchi. 2014. Postglacial history of the Patagonian forest/steppe ecotone (41â€”43Â°S). Quaternary Science Reviews 94:120-135.
284	SAn	Lago Los Ninos	1070	-71.4915	-44.0103	100	16988	Neotoma		Iglesias, V., V. Markgraf, and C. Whitlock. 2016. 17,000 years of vegetation, fire and climate change in the eastern foothills of the Andes (lat. 44Â°S). Palaeogeography, Palaeoclimatology, Palaeoecology 457:195-208.
285	SAn	Laguna La Pava	696	-71.5233	-44.2797	53	112500	Neotoma		Iglesias, V., V. Markgraf, and C. Whitlock. 2016. 17,000 years of vegetation, fire and climate change in the eastern foothills of the Andes (lat. 44Â°S). Palaeogeography, Palaeoclimatology, Palaeoecology 457:195-208.
286	SAn	Mallín Fontanito	939	-71.5644	-44.9086	19	17042	Neotoma	Neotoma	Nanavati, W., C. Whitlock, V. Iglesias, and M.E. de Porras. 2019. Postglacial vegetation, fire, and climate history along the eastern Andes, Argentina and Chile (lat. 41–55°S). Quaternary Science Reviews
287	SAn	Mallin Pollux	710	-71.8397	-45.6897	-47	17657	Neotoma	Neotoma	Markgraf, V., C. Whitlock, and S. Haberle. 2007. Vegetation and fire history during the last 18,000 cal yr B.P. in Southern Patagonia: Mallín Pollux, Coyhaique, Province Aisén (45°41S, 71°50 W, 640 m elevation). Palaeogeography, Palaeoclimatology, Palaeoecology 254(3-4):492-507.
288	SAn	MD07-3088	-1000	-75.6836	-46.0669	993	21496	Manually extracted		Montade, V., Combourieu Nebout, N., Kissel, C., Haberle, S.G., Siani, G., Michel, E., 2013. Vegetation and climate changes during the last 22,000yr from a marine core near Taitao Peninsula, southern Chile. Palaeogeogr. Palaeoclimatol. Palaeoecol. 369, 335–348.
289	SAn	La Esperanza	671	-72.8333	-46.6333	7	232	Neotoma		Graf, K. 1992. Pollendiagramme aus den Anden: Eine Synthese zur Klimageschichte und Vegetationsentwicklung seit der letzten Eiszeit. Physische Geographie 34. Universität Zürich-Irchel, Geographisches Institut, Zürich, Switzerland.
290	SAn	Mallin Casanova	227	-72.9752	-47.6436	-66	10322	Neotoma		Iglesias, V., S.G. Haberle, A. Holz, and C. Whitlock. 2018. Holocene dynamics of temperate rainforests in west-central Patagonia. Frontiers in Ecology and Evolution 5:177.
291	SAn	Témpano Sur	173	-74.0153	-48.7328	11407	13767	Neotoma		Ashworth, A.C., and V. Markgraf. 1989. Climate of the Chilean Channels between 11,000 and 10,000 yr B.P. based on fossil beetle and pollen analyses. Revista Chilena de Historia Natural 62:61-74.
292	-	Lago Cardiel	285	-71.257	-48.9413	47	10924	Neotoma	Neotoma	Markgraf, V., J.P. Bradbury, A. Schwalb, S.J. Burns, C. Stern, D. Ariztegui, A. Gilli, F.A. Anselmetti, S. Stine, and N. Maidana. 2003. Holocene palaeoclimates of southern Patagonia: limnological and environmental history of Lago Cardiel, Argentina. The Holocene 13(4):581-591.
293	-	Puerto Edén	214	-74.4323	-49.1301	0	14741	Neotoma		Ashworth, A.C., V. Markgraf, and C. Villagrán. 1991. Late Quaternary climatic history of the Chilean Channels based on fossil pollen and beetle analyses, with an analysis of the modern vegetation and pollen rain. Journal of Quaternary Science 6:279-291..
294	SAn	Moreno Glacier Bog	360	-73	-50.4667	0	9550	Neotoma		Mercer, J.H., and T.A. Ager. 1983. Glacial and floral changes in southern Argentina since 14,000 years ago. National Geographic Society Research Reports 15:457-477.
295	SAn	Meseta Latorre	942	-72.05	-51.5167	63	5269	Neotoma		Schäbitz, F. 1991. Holocene vegetation and climate in southern Santa Cruz, Argentina. Bamberger Geographische Schriften 11:235-244.
296	SAn	Cueva Milodon	92	-72.6333	-51.5833	10832	13470	Neotoma		Markgraf, V. 1985. Late Pleistocene faunal extinction in southern Patagonia. Science 228:1110-1112..
297	-	Surf Bay	16	-57.7869	-51.7019	41	14030	Neotoma		Groff, D.V., K.M. Hamley, T.J.R. Lessard, K.E. Greenawalt, M. Yasuhara, P. Brickle, and J.L. Gill. 2020. Seabird establishment during regional cooling drove a terrestrial ecosystem shift 5000 years ago. Science Advances 6(43):eabb2788.
298	-	Mount Usborne	351	-58.8141	-51.7039	516	13273	Neotoma	Neotoma	Hamley, K.M., J.L. Gill, K.E. Krasinski, D.V. Groff, B.L. Hall, D.H. Sandweiss, J.R. Southon, P. Brickle, and T.V. Lowell. 2021. Evidence of prehistoric human activity in the Falkland Islands. Science Advances 7.
299	-	New Island	60	-61.3056	-51.7193	-57	7963	Neotoma	Neotoma	Hamley, K.M., J.L. Gill, K.E. Krasinski, D.V. Groff, B.L. Hall, D.H. Sandweiss, J.R. Southon, P. Brickle, and T.V. Lowell. 2021. Evidence of prehistoric human activity in the Falkland Islands. Science Advances 7.
300	SAn	Rio Rubens Bog	181	-71.8781	-52.0375	-46	17551	Neotoma		Huber, U.M., V. Markgraf, and F. Schäbitz. 2004. Geographical and temporal trends in Late Quaternary fire histories of Fuego-Patagonia, South America. Quaternary Science Reviews 23(9-10):1079-1097.
301	SAn	Rio Rubens	510	-71.88	-52.13	-263	16912	Neotoma	Neotoma	Huber, U.M., V. Markgraf, and F. Schäbitz. 2004. Geographical and temporal trends in Late Quaternary fire histories of Fuego-Patagonia, South America. Quaternary Science Reviews 23(9-10):1079-1097
302	SAn	La Mision	78	-68.4	-53.5	0	11730	Neotoma		Markgraf, V. 1983. Late and postglacial vegetational and paleoclimatic changes in subantarctic, temperate, and arid environments in Argentina. Palynology 7(1):43-70.
303	SAn	Puerto del Hambre core	44	-70.94	-53.6	51	19338		Reading Palaeofire	McCulloch, R.D., Davies, S.J., 2001. Late-glacial and Holocene palaeoenvironmental change in the central Strait of Magellan, southern Patagonia. Palaeogeography, Palaeoclimatology, Palaeoecology 173, 143–173.
304	SAn	Isla Clarence	134	-71.2333	-54.2	85	11633	Neotoma		Markgraf, V. 1983. Late and postglacial vegetational and paleoclimatic changes in subantarctic, temperate, and arid environments in Argentina. Palynology 7(1):43-70.
305	SAn	Yehuin	68	-67.75	-54.3333	226	12622	Neotoma		Markgraf, V. 1983. Late and postglacial vegetational and paleoclimatic changes in subantarctic, temperate, and arid environments in Argentina. Palynology 7(1):43-70.
306	SAn	Paso Garibaldi	437	-67.8333	-54.7167	-40	14746	Neotoma		Markgraf, V. 1993. Paleoenvironments and paleoclimates in Tierra del Fuego and southernmost Patagonia, South America. Palaeogeography, Palaeoclimatology, Palaeoecology 102(1-2):53-68.
307	SAn	Harberton	94	-67.2968	-54.8708	125	14938	Neotoma	Neotoma	Markgraf, V. 1991. Younger Dryas in southern South America?. Boreas 20(1):63-69.
308	SAn	Punta Burslem	87	-67.9532	-54.9016	947	15568	Manually extracted		McCulloch, R.D., Blaikie, J., Jacob, B., Mansilla, C.A., Morello, F., De Pol-Holz, R., San Román, M., Tisdall, E., Torres, J., 2020. Late glacial and Holocene climate variability, southernmost Patagonia. Quat. Sci. Rev. 229, 1–14.
